# Supplementary material for: Massive Regime Shifts and High Activity of Heterotrophic Bacteria in an Ice-Covered Lake
Source: PubMed Central journal article supplement (PMC4242651; doi:10.1371/journal.pone.0113611), 2014-11-24
Supplement: pone.0113611.s008.pdf [file pone.0113611.s008.pdf]

| Phase(I)-EL-PA | Phase(I)-EL-FL | Phase(II)-EL-PA | Phase(II)-EL-FL | Phase(I)-HL-PA | Phase(I)-HL-FL | Phase(II)-HL-PA | Phase(II)-HL-FL | Domain   | Phylum         | Class          | Order                          | Family                | Genus                   |
|----------------|----------------|-----------------|-----------------|----------------|----------------|-----------------|-----------------|----------|----------------|----------------|--------------------------------|-----------------------|-------------------------|
| 0.00           | 0.00           | 0.00            | 0.00            | 0.05           | 0.00           | 0.00            | 0.01            | Bacteria | Acidobacteria  | Acidobacteria  | 45597                          |                       |                         |
| 0.00           | 0.00           | 0.00            | 0.00            | 0.02           | 0.00           | 0.00            | 0.00            | Bacteria | Acidobacteria  | Acidobacteria  | Acidobacteriales               | Acidobacteriaceae     | Granulicella            |
| 0.00           | 0.00           | 0.00            | 0.00            | 0.12           | 0.00           | 0.00            | 0.00            | Bacteria | Acidobacteria  | Acidobacteria  | BPC102                         |                       |                         |
| 2.14           | 0.00           | 0.03            | 0.00            | 0.35           | 0.02           | 0.02            | 0.01            | Bacteria | Acidobacteria  | Acidobacteria  | Candidatus Chloracidobacterium |                       |                         |
| 0.00           | 0.00           | 0.00            | 0.00            | 0.00           | 0.01           | 0.02            | 0.01            | Bacteria | Acidobacteria  | Acidobacteria  | Candidatus Solibacter          |                       |                         |
| 0.00           | 0.07           | 0.00            | 0.00            | 0.70           | 0.08           | 0.01            | 0.09            | Bacteria | Acidobacteria  | Acidobacteria  | DA023                          |                       |                         |
| 0.00           | 0.00           | 0.00            | 0.00            | 0.00           | 0.00           | 0.00            | 0.02            | Bacteria | Acidobacteria  | Acidobacteria  | DA052                          |                       |                         |
| 0.00           | 0.15           | 0.00            | 0.00            | 0.00           | 0.14           | 0.00            | 0.04            | Bacteria | Acidobacteria  | Acidobacteria  | Order Incertae Sedis           | Family Incertae Sedis | Bryobacter              |
| 0.00           | 0.00           | 0.00            | 0.00            | 0.02           | 0.00           | 0.00            | 0.02            | Bacteria | Acidobacteria  | Acidobacteria  | SJA-149                        |                       |                         |
| 0.00           | 0.00           | 0.00            | 0.00            | 0.05           | 0.00           | 0.01            | 0.00            | Bacteria | Acidobacteria  | Holophagae     | 32-20                          |                       |                         |
| 0.00           | 0.00           | 0.00            | 0.00            | 0.17           | 0.00           | 0.00            | 0.00            | Bacteria | Acidobacteria  | Holophagae     | FW34                           |                       |                         |
| 0.00           | 0.29           | 0.00            | 0.00            | 0.30           | 0.31           | 0.00            | 0.19            | Bacteria | Acidobacteria  | Holophagae     | Holophagales                   | Holophagaceae         | marine group            |
| 0.00           | 0.00           | 0.00            | 0.00            | 0.42           | 0.01           | 0.04            | 0.06            | Bacteria | Acidobacteria  | Holophagae     | Holophagales                   | Holophagaceae         | uncultured              |
| 0.00           | 0.00           | 0.00            | 0.00            | 0.05           | 0.00           | 0.00            | 0.00            | Bacteria | Acidobacteria  | Holophagae     | NKB17                          |                       |                         |
| 0.00           | 0.00           | 0.00            | 0.00            | 0.00           | 0.00           | 0.00            | 0.00            | Bacteria | Acidobacteria  | Holophagae     | iii1-8                         |                       |                         |
| 0.00           | 0.00           | 0.00            | 0.00            | 0.02           | 0.00           | 0.00            | 0.00            | Bacteria | Acidobacteria  | Acidobacteria  | RB25                           |                       |                         |
| 0.00           | 0.90           | 0.00            | 0.08            | 0.60           | 1.27           | 0.01            | 1.14            | Bacteria | Actinobacteria | Acidimicrobiia | Acidimicrobiales               | Acidimicrobiaceae     | CL500-29 marine group   |
| 0.00           | 0.00           | 0.00            | 0.00            | 0.05           | 0.00           | 0.00            | 0.00            | Bacteria | Actinobacteria | Acidimicrobiia | Acidimicrobiales               | Acidimicrobiaceae     | uncultured              |
| 1.29           | 0.02           | 0.00            | 0.00            | 0.22           | 0.01           | 0.03            | 0.01            | Bacteria | Actinobacteria | Acidimicrobiia | Acidimicrobiales               | Candidatus Microthrix |                         |
| 0.00           | 0.00           | 0.00            | 0.00            | 0.05           | 0.00           | 0.00            | 0.00            | Bacteria | Actinobacteria | Acidimicrobiia | Acidimicrobiales               | lamiaceae             | lamia                   |
| 0.00           | 0.00           | 0.00            | 0.00            | 0.05           | 0.00           | 0.00            | 0.00            | Bacteria | Actinobacteria | Acidimicrobiia | Acidimicrobiales               | OCS155 marine group   |                         |
| 0.00           | 0.17           | 0.01            | 0.01            | 0.30           | 0.24           | 0.01            | 0.22            | Bacteria | Actinobacteria | Acidimicrobiia | Acidimicrobiales               | TM214                 |                         |
| 0.00           | 0.00           | 0.00            | 0.00            | 0.20           | 0.02           | 0.01            | 0.02            | Bacteria | Actinobacteria | Acidimicrobiia | Acidimicrobiales               | uncultured            |                         |
| 0.00           | 0.00           | 0.00            | 0.00            | 0.15           | 0.00           | 0.01            | 0.04            | Bacteria | Actinobacteria | Actinobacteria | Corynebacteriales              | Mycobacteriaceae      | Mycobacterium           |
| 0.00           | 0.00           | 0.00            | 0.00            | 0.02           | 0.00           | 0.00            | 0.00            | Bacteria | Actinobacteria | Actinobacteria | Corynebacteriales              | Nocardiaceae          | Nocardia                |
| 0.00           | 0.00           | 0.00            | 0.00            | 0.00           | 0.00           | 0.00            | 0.00            | Bacteria | Actinobacteria | Actinobacteria | Corynebacteriales              | Nocardiaceae          | Rhodococcus             |
| 0.00           | 0.00           | 0.00            | 0.00            | 0.02           | 0.00           | 0.00            | 0.00            | Bacteria | Actinobacteria | Actinobacteria | Frankiales                     | Cryptosporangiaceae   | Fodinicola              |
| 0.00           | 0.00           | 0.00            | 0.00            | 0.12           | 0.00           | 0.00            | 0.00            | Bacteria | Actinobacteria | Actinobacteria | Frankiales                     | Frankiaceae           | Frankia                 |
| 0.00           | 0.00           | 0.00            | 0.00            | 0.10           | 0.00           | 0.00            | 0.00            | Bacteria | Actinobacteria | Actinobacteria | Frankiales                     | Geodermatophilaceae   | Geodermatophilus        |
| 0.00           | 1.38           | 0.00            | 0.03            | 0.15           | 1.27           | 0.01            | 0.93            | Bacteria | Actinobacteria | Actinobacteria | Frankiales                     | Sporichthyaceae       | Candidatus Planktophila |
| 0.00           | 0.00           | 0.00            | 0.00            | 0.25           | 0.05           | 0.00            | 0.03            | Bacteria | Actinobacteria | Actinobacteria | Frankiales                     | Sporichthyaceae       | Sporichthya             |
| 1.72           | 43.62          | 0.00            | 1.00            | 5.80           | 40.29          | 0.02            | 26.05           | Bacteria | Actinobacteria | Actinobacteria | Frankiales                     | Sporichthyaceae       | hgcl clade              |
| 0.00           | 0.00           | 0.00            | 0.00            | 0.02           | 0.00           | 0.00            | 0.00            | Bacteria | Actinobacteria | Actinobacteria | Frankiales                     | Sporichthyaceae       | uncultured              |
| 0.00           | 0.00           | 0.00            | 0.00            | 0.07           | 0.00           | 0.00            | 0.00            | Bacteria | Actinobacteria | Actinobacteria | Micrococcales                  | Dermatophilaceae      | uncultured              |
| 0.00           | 0.00           | 0.00            | 0.00            | 0.00           | 0.00           | 0.00            | 0.01            | Bacteria | Actinobacteria | Actinobacteria | Micrococcales                  | Intrasporangiaceae    | Humibacillus            |
| 0.00           | 0.00           | 0.00            | 0.00            | 0.00           | 0.00           | 0.00            | 0.00            | Bacteria | Actinobacteria | Actinobacteria | Micrococcales                  | Intrasporangiaceae    | Janibacter              |
| 0.00           | 0.00           | 0.00            | 0.00            | 0.00           | 0.00           | 0.00            | 0.00            | Bacteria | Actinobacteria | Actinobacteria | Micrococcales                  | Microbacteriaceae     | Agrococcus              |
| 0.00           | 0.00           | 0.00            | 0.00            | 0.00           | 0.01           | 0.00            | 0.00            | Bacteria | Actinobacteria | Actinobacteria | Micrococcales                  | Microbacteriaceae     | Alpinimonas             |
| 0.00           | 0.02           | 0.00            | 0.00            | 0.00           | 0.00           | 0.00            | 0.00            | Bacteria | Actinobacteria | Actinobacteria | Micrococcales                  | Microbacteriaceae     | Candidatus Aquiluna     |
| 0.00           | 0.00           | 0.00            | 0.00            | 0.00           | 0.00           | 0.00            | 0.03            | Bacteria | Actinobacteria | Actinobacteria | Micrococcales                  | Microbacteriaceae     | Candidatus Limnoluna    |
| 0.00           | 0.02           | 0.00            | 0.00            | 0.02           | 0.00           | 0.00            | 0.00            | Bacteria | Actinobacteria | Actinobacteria | Micrococcales                  | Microbacteriaceae     | Candidatus Rhodoluna    |
| 0.00           | 0.00           | 0.00            | 0.00            | 0.00           | 0.00           | 0.01            | 0.00            | Bacteria | Actinobacteria | Actinobacteria | Micrococcales                  | Microbacteriaceae     | Leifsonia               |
| 0.00           | 0.00           | 0.00            | 0.00            | 0.00           | 0.00           | 0.01            | 0.01            | Bacteria | Actinobacteria | Actinobacteria | Micrococcales                  | Microbacteriaceae     | S24526                  |
| 0.00           | 0.00           | 0.00            | 0.00            | 0.00           | 0.00           | 0.00            | 0.01            | Bacteria | Actinobacteria | Actinobacteria | Micrococcales                  | Microbacteriaceae     | Yonghaparkia            |
| 0.00           | 0.00           | 0.00            | 0.00            | 0.00           | 0.01           | 0.00            | 0.03            | Bacteria | Actinobacteria | Actinobacteria | Micrococcales                  | Micrococceae          | Arthrobacter            |
| 0.86           | 0.22           | 0.00            | 0.00            | 0.12           | 0.56           | 0.00            | 0.59            | Bacteria | Actinobacteria | Actinobacteria | PeM15                          |                       |                         |
| 0.00           | 0.00           | 0.00            | 0.00            | 0.05           | 0.00           | 0.00            | 0.00            | Bacteria | Actinobacteria | Actinobacteria | Propionibacteriales            | Nocardioideae         | Nocardioides            |
| 0.00           | 0.00           | 0.00            | 0.00            | 0.00           | 0.05           | 0.01            | 0.00            | Bacteria | Actinobacteria | Actinobacteria | Propionibacteriales            | Propionibacteriaceae  | Propionibacterium       |
| 0.00           | 0.00           | 0.01            | 0.00            | 0.00           | 0.00           | 0.00            | 0.00            | Bacteria | Actinobacteria | Actinobacteria | Pseudonocardiales              | Pseudonocardiaeae     | Pseudonocardia          |
| 0.00           | 0.00           | 0.00            | 0.00            | 0.00           | 0.01           | 0.00            | 0.00            | Bacteria | Actinobacteria | Actinobacteria | Streptomycetales               | Streptomycetaceae     | Streptomyces            |
| 0.00           | 0.00           | 0.00            | 0.00            | 0.00           | 0.01           | 0.00            | 0.00            | Bacteria | Actinobacteria | Actinobacteria | Streptosporangiales            | Streptosporangiaceae  | Streptosporangium       |
| 0.00           | 0.00           | 0.00            | 0.00            | 0.12           | 0.00           | 0.00            | 0.00            | Bacteria | Actinobacteria | Actinobacteria | MB-A2-108                      |                       |                         |

| Phase(I)-EL-PA | Phase(I)-EL-FL | Phase(II)-EL-PA | Phase(II)-EL-FL | Phase(I)-HL-PA | Phase(I)-HL-FL | Phase(II)-HL-PA | Phase(II)-HL-FL | Domain   | Phylum          | Class            | Order                    | Family               | Genus                           |
|----------------|----------------|-----------------|-----------------|----------------|----------------|-----------------|-----------------|----------|-----------------|------------------|--------------------------|----------------------|---------------------------------|
| 0.00           | 0.00           | 0.00            | 0.00            | 0.32           | 0.00           | 0.00            | 0.00            | Bacteria | Actinobacteria  | OPB41            |                          |                      |                                 |
| 0.00           | 0.00           | 0.00            | 0.00            | 0.10           | 0.00           | 0.00            | 0.01            | Bacteria | Actinobacteria  | Thermoleophilia  | Gaiellales               | Gaiellaceae          | Gaiella                         |
| 0.86           | 0.32           | 0.00            | 0.00            | 0.22           | 0.41           | 0.00            | 0.42            | Bacteria | Actinobacteria  | Thermoleophilia  | Gaiellales               | uncultured           |                                 |
| 0.00           | 0.05           | 0.00            | 0.00            | 0.07           | 0.10           | 0.00            | 0.26            | Bacteria | Actinobacteria  | Thermoleophilia  | Solirubrobacterales      | 0319-6M6             |                                 |
| 0.00           | 0.02           | 0.00            | 0.00            | 0.20           | 0.08           | 0.01            | 0.07            | Bacteria | Actinobacteria  | Thermoleophilia  | Solirubrobacterales      | 480-2                |                                 |
| 0.00           | 0.00           | 0.00            | 0.00            | 0.00           | 0.00           | 0.00            | 0.01            | Bacteria | Actinobacteria  | Thermoleophilia  | Solirubrobacterales      | Patulibacteraceae    | Patulibacter                    |
| 0.00           | 0.00           | 0.00            | 0.00            | 0.00           | 0.01           | 0.00            | 0.00            | Bacteria | Actinobacteria  | Thermoleophilia  | Solirubrobacterales      | TM146                |                                 |
| 0.00           | 0.00           | 0.00            | 0.00            | 0.20           | 0.00           | 0.00            | 0.00            | Bacteria | Armatimonadetes |                  |                          |                      |                                 |
| 0.43           | 0.00           | 0.00            | 0.00            | 0.05           | 0.06           | 0.00            | 0.05            | Bacteria | Armatimonadetes | Armatimonadia    | Armatimonadales          | Armatimonadaceae     | Armatimonas                     |
| 0.00           | 0.00           | 0.00            | 0.00            | 0.05           | 0.00           | 0.00            | 0.00            | Bacteria | Armatimonadetes | Chthonomonadetes | Chthonomonadales         | Chthonomonadaceae    | Chthonomonas                    |
| 0.00           | 0.00           | 0.00            | 0.00            | 0.10           | 0.02           | 0.00            | 0.01            | Bacteria | BD1-5           |                  |                          |                      |                                 |
| 0.00           | 0.00           | 0.00            | 0.00            | 0.05           | 0.00           | 0.00            | 0.00            | Bacteria | BH180-139       |                  |                          |                      |                                 |
| 0.00           | 0.00           | 0.00            | 0.00            | 0.05           | 0.00           | 0.00            | 0.00            | Bacteria | Bacteroidetes   | BD2-2            |                          |                      |                                 |
| 0.00           | 0.00           | 0.00            | 0.00            | 0.02           | 0.00           | 0.00            | 0.00            | Bacteria | Bacteroidetes   | BSV13            |                          |                      |                                 |
| 0.00           | 0.00           | 0.00            | 0.00            | 0.02           | 0.00           | 0.00            | 0.00            | Bacteria | Bacteroidetes   | Bacteroidia      | Bacteroidales            | Rikenellaceae        | Blvii28 wastewater-sludge group |
| 0.00           | 0.05           | 0.00            | 0.00            | 0.05           | 0.09           | 0.00            | 0.07            | Bacteria | Bacteroidetes   | Cytophagia       | Cytophagales             | Cyclobacteriaceae    | uncultured                      |
| 0.00           | 0.00           | 0.00            | 0.00            | 0.00           | 0.00           | 0.00            | 0.00            | Bacteria | Bacteroidetes   | Cytophagia       | Cytophagales             | Cytophagaceae        | Adhaeribacter                   |
| 0.00           | 0.34           | 0.00            | 0.01            | 0.05           | 0.19           | 0.00            | 0.16            | Bacteria | Bacteroidetes   | Cytophagia       | Cytophagales             | Cytophagaceae        | Aricella                        |
| 0.43           | 0.00           | 0.00            | 0.00            | 0.37           | 0.00           | 0.00            | 0.00            | Bacteria | Bacteroidetes   | Cytophagia       | Cytophagales             | Cytophagaceae        | Flexibacter                     |
| 0.00           | 0.00           | 0.00            | 0.00            | 0.02           | 0.00           | 0.00            | 0.01            | Bacteria | Bacteroidetes   | Cytophagia       | Cytophagales             | Cytophagaceae        | Hymenobacter                    |
| 0.00           | 0.00           | 0.00            | 0.00            | 0.02           | 0.00           | 0.00            | 0.00            | Bacteria | Bacteroidetes   | Cytophagia       | Cytophagales             | Cytophagaceae        | Leadbetterella                  |
| 0.00           | 0.00           | 0.00            | 0.00            | 0.02           | 0.00           | 0.00            | 0.00            | Bacteria | Bacteroidetes   | Cytophagia       | Cytophagales             | Cytophagaceae        | Runella                         |
| 0.00           | 0.00           | 0.00            | 0.00            | 0.05           | 0.00           | 0.00            | 0.00            | Bacteria | Bacteroidetes   | Cytophagia       | Cytophagales             | Cytophagaceae        | Spirosoma                       |
| 0.43           | 0.00           | 0.00            | 0.00            | 0.00           | 0.00           | 0.00            | 0.00            | Bacteria | Bacteroidetes   | Cytophagia       | Cytophagales             | Flammeovirgaceae     | Candidatus Amoebophilus         |
| 0.86           | 0.00           | 0.00            | 0.00            | 0.00           | 0.00           | 0.00            | 0.00            | Bacteria | Bacteroidetes   | Cytophagia       | Cytophagales             | Flammeovirgaceae     | Candidatus Cardinium            |
| 0.00           | 0.00           | 0.00            | 0.00            | 0.02           | 0.00           | 0.00            | 0.00            | Bacteria | Bacteroidetes   | Cytophagia       | Order III Incertae Sedis |                      |                                 |
| 0.86           | 1.26           | 0.00            | 0.03            | 1.32           | 0.74           | 0.00            | 0.37            | Bacteria | Bacteroidetes   | Flavobacteria    | Flavobacteriales         | Cryomorphaceae       | Fluviicola                      |
| 0.00           | 0.00           | 0.00            | 0.00            | 0.02           | 0.00           | 0.00            | 0.00            | Bacteria | Bacteroidetes   | Flavobacteria    | Flavobacteriales         | Flavobacteriaceae    | Chryseobacterium                |
| 6.87           | 0.27           | 21.89           | 55.12           | 2.07           | 0.10           | 16.82           | 18.78           | Bacteria | Bacteroidetes   | Flavobacteria    | Flavobacteriales         | Flavobacteriaceae    | Flavobacterium                  |
| 0.00           | 0.00           | 0.00            | 0.00            | 0.00           | 0.02           | 0.00            | 0.01            | Bacteria | Bacteroidetes   | Flavobacteria    | Flavobacteriales         | Flavobacteriaceae    | NS3a marine group               |
| 0.00           | 0.00           | 0.00            | 0.00            | 0.00           | 0.00           | 0.00            | 0.00            | Bacteria | Bacteroidetes   | Flavobacteria    | Flavobacteriales         | Flavobacteriaceae    | NS5 marine group                |
| 0.00           | 0.00           | 0.00            | 0.00            | 0.00           | 0.00           | 0.00            | 0.01            | Bacteria | Bacteroidetes   | Flavobacteria    | Flavobacteriales         | Flavobacteriaceae    | uncultured                      |
| 0.00           | 0.02           | 0.00            | 0.00            | 0.20           | 0.13           | 0.01            | 0.02            | Bacteria | Bacteroidetes   | Flavobacteria    | Flavobacteriales         | NS9 marine group     |                                 |
| 0.00           | 0.00           | 0.00            | 0.00            | 0.00           | 0.00           | 0.00            | 0.00            | Bacteria | Bacteroidetes   | Flavobacteria    | Flavobacteriales         | R103-B20             |                                 |
| 0.00           | 0.00           | 0.00            | 0.00            | 0.07           | 0.00           | 0.00            | 0.00            | Bacteria | Bacteroidetes   | SB-1             |                          |                      |                                 |
| 0.00           | 0.00           | 0.03            | 0.00            | 0.05           | 0.00           | 0.00            | 0.00            | Bacteria | Bacteroidetes   | SB-5             |                          |                      |                                 |
| 0.00           | 0.00           | 0.00            | 0.00            | 0.05           | 0.00           | 0.00            | 0.00            | Bacteria | Bacteroidetes   | Sphingobacteriia | Sphingobacteriales       |                      |                                 |
| 0.00           | 0.00           | 0.00            | 0.00            | 0.00           | 0.00           | 0.00            | 0.00            | Bacteria | Bacteroidetes   | Sphingobacteriia | Sphingobacteriales       | AKYH767              |                                 |
| 0.86           | 0.87           | 0.00            | 0.00            | 0.47           | 0.53           | 0.02            | 0.38            | Bacteria | Bacteroidetes   | Sphingobacteriia | Sphingobacteriales       | Chitinophagaceae     | Ferruginibacter                 |
| 0.43           | 0.00           | 0.00            | 0.00            | 0.10           | 0.00           | 0.00            | 0.00            | Bacteria | Bacteroidetes   | Sphingobacteriia | Sphingobacteriales       | Chitinophagaceae     | Filimonas                       |
| 0.00           | 0.19           | 0.00            | 0.00            | 0.15           | 0.02           | 0.00            | 0.08            | Bacteria | Bacteroidetes   | Sphingobacteriia | Sphingobacteriales       | Chitinophagaceae     | Hydrotalea                      |
| 0.86           | 0.83           | 0.00            | 0.01            | 0.37           | 0.40           | 0.00            | 0.46            | Bacteria | Bacteroidetes   | Sphingobacteriia | Sphingobacteriales       | Chitinophagaceae     | Sediminibacterium               |
| 0.00           | 0.00           | 0.00            | 0.00            | 0.00           | 0.00           | 0.00            | 0.00            | Bacteria | Bacteroidetes   | Sphingobacteriia | Sphingobacteriales       | Chitinophagaceae     | Segetibacter                    |
| 0.00           | 0.24           | 0.00            | 0.00            | 0.25           | 0.16           | 0.01            | 0.14            | Bacteria | Bacteroidetes   | Sphingobacteriia | Sphingobacteriales       | Chitinophagaceae     | uncultured                      |
| 0.00           | 0.00           | 0.00            | 0.00            | 0.00           | 0.00           | 0.00            | 0.01            | Bacteria | Bacteroidetes   | Sphingobacteriia | Sphingobacteriales       | FFCH9454             |                                 |
| 0.00           | 0.00           | 0.00            | 0.00            | 0.02           | 0.00           | 0.00            | 0.00            | Bacteria | Bacteroidetes   | Sphingobacteriia | Sphingobacteriales       | KD1-131              |                                 |
| 0.00           | 0.39           | 0.01            | 0.00            | 0.37           | 0.49           | 0.03            | 0.25            | Bacteria | Bacteroidetes   | Sphingobacteriia | Sphingobacteriales       | KD3-93               |                                 |
| 1.29           | 0.02           | 0.00            | 0.01            | 0.15           | 0.04           | 0.00            | 0.04            | Bacteria | Bacteroidetes   | Sphingobacteriia | Sphingobacteriales       | LiUU-11-161          |                                 |
| 0.00           | 0.15           | 0.00            | 0.00            | 0.02           | 0.07           | 0.00            | 0.08            | Bacteria | Bacteroidetes   | Sphingobacteriia | Sphingobacteriales       | NS11-12 marine group |                                 |
| 2.14           | 0.05           | 0.00            | 0.00            | 0.72           | 0.03           | 0.01            | 0.01            | Bacteria | Bacteroidetes   | Sphingobacteriia | Sphingobacteriales       | PHOS-HE51            |                                 |
| 0.00           | 0.00           | 0.00            | 0.00            | 0.02           | 0.00           | 0.00            | 0.00            | Bacteria | Bacteroidetes   | Sphingobacteriia | Sphingobacteriales       | ST-12K33             |                                 |
| 0.00           | 0.00           | 0.01            | 0.00            | 0.12           | 0.02           | 0.03            | 0.00            | Bacteria | Bacteroidetes   | Sphingobacteriia | Sphingobacteriales       | Saprosiraceae        | Candidatus Aquirestis           |

| Phase(I)-EL-PA | Phase(I)-EL-FL | Phase(II)-EL-PA | Phase(II)-EL-FL | Phase(I)-HL-PA | Phase(I)-HL-FL | Phase(II)-HL-PA | Phase(II)-HL-FL | Domain   | Phylum                  | Class             | Order                | Family                | Genus           |
|----------------|----------------|-----------------|-----------------|----------------|----------------|-----------------|-----------------|----------|-------------------------|-------------------|----------------------|-----------------------|-----------------|
| 0.00           | 0.00           | 0.00            | 0.00            | 0.12           | 0.00           | 0.00            | 0.00            | Bacteria | Bacteroidetes           | Sphingobacteriia  | Sphingobacteriales   | Saprospiraceae        | uncultured      |
| 0.00           | 0.85           | 0.00            | 0.00            | 0.02           | 0.64           | 0.00            | 0.59            | Bacteria | Bacteroidetes           | Sphingobacteriia  | Sphingobacteriales   | Sphingobacteriaceae   | Pedobacter      |
| 0.00           | 0.07           | 0.00            | 0.00            | 0.00           | 0.01           | 0.00            | 0.03            | Bacteria | Bacteroidetes           | Sphingobacteriia  | Sphingobacteriales   | Sphingobacteriaceae   | Solitalea       |
| 0.00           | 0.00           | 0.00            | 0.00            | 0.17           | 0.00           | 0.00            | 0.00            | Bacteria | Bacteroidetes           | Sphingobacteriia  | Sphingobacteriales   | WCHB1-69              |                 |
| 1.72           | 0.34           | 0.00            | 0.01            | 1.44           | 0.68           | 0.01            | 0.57            | Bacteria | Bacteroidetes           | Sphingobacteriia  | Sphingobacteriales   | env.OPS 17            |                 |
| 0.00           | 0.00           | 0.00            | 0.00            | 0.05           | 0.00           | 0.00            | 0.00            | Bacteria | Bacteroidetes           | VC2.1 Bac22       |                      |                       |                 |
| 0.00           | 0.00           | 0.00            | 0.00            | 0.72           | 0.00           | 0.00            | 0.00            | Bacteria | Bacteroidetes           | vadinHA17         |                      |                       |                 |
| 0.00           | 0.00           | 0.00            | 0.00            | 0.27           | 0.00           | 0.01            | 0.00            | Bacteria | Candidate division BRC1 |                   |                      |                       |                 |
| 0.00           | 0.00           | 0.00            | 0.00            | 0.05           | 0.00           | 0.00            | 0.01            | Bacteria | Candidate division OD1  |                   |                      |                       |                 |
| 0.00           | 0.00           | 0.00            | 0.00            | 0.02           | 0.00           | 0.01            | 0.00            | Bacteria | Candidate division OP11 |                   |                      |                       |                 |
| 0.00           | 0.00           | 0.00            | 0.00            | 0.22           | 0.02           | 0.00            | 0.00            | Bacteria | Candidate division OP3  |                   |                      |                       |                 |
| 0.00           | 0.00           | 0.00            | 0.00            | 0.02           | 0.00           | 0.00            | 0.00            | Bacteria | Candidate division OP9  |                   |                      |                       |                 |
| 0.00           | 0.00           | 0.00            | 0.00            | 0.05           | 0.00           | 0.00            | 0.00            | Bacteria | Candidate division SR1  |                   |                      |                       |                 |
| 0.00           | 0.02           | 0.00            | 0.01            | 0.22           | 0.06           | 0.00            | 0.07            | Bacteria | Candidate division TM7  |                   |                      |                       |                 |
| 0.00           | 0.00           | 0.00            | 0.00            | 0.42           | 0.00           | 0.00            | 0.00            | Bacteria | Candidate division WS3  |                   |                      |                       |                 |
| 0.43           | 0.56           | 0.03            | 0.02            | 0.75           | 0.43           | 0.01            | 0.51            | Bacteria | Chlorobi                | Chlorobia         | Chlorobiales         | OPB56                 |                 |
| 0.00           | 0.00           | 0.00            | 0.00            | 0.05           | 0.00           | 0.00            | 0.00            | Bacteria | Chlorobi                | Chlorobia         | Chlorobiales         | SJA-28                |                 |
| 0.00           | 0.00           | 0.00            | 0.00            | 0.55           | 0.00           | 0.00            | 0.00            | Bacteria | Chlorobi                | Ignavibacteria    | Ignavibacteriales    | BSV26                 |                 |
| 0.00           | 0.00           | 0.00            | 0.00            | 0.10           | 0.00           | 0.00            | 0.00            | Bacteria | Chlorobi                | Ignavibacteria    | Ignavibacteriales    | Ignavibacteriaceae    | Ignavibacterium |
| 0.00           | 0.00           | 0.00            | 0.00            | 0.10           | 0.00           | 0.00            | 0.00            | Bacteria | Chlorobi                | Ignavibacteria    | Ignavibacteriales    | LD-RB-34              |                 |
| 0.00           | 0.00           | 0.00            | 0.00            | 0.10           | 0.00           | 0.00            | 0.00            | Bacteria | Chlorobi                | Ignavibacteria    | Ignavibacteriales    | PHOS-HE36             |                 |
| 0.00           | 0.00           | 0.00            | 0.00            | 0.02           | 0.00           | 0.00            | 0.00            | Bacteria | Chlorobi                | Ignavibacteria    | Ignavibacteriales    | SR-FBR-L83            |                 |
| 0.00           | 0.00           | 0.00            | 0.00            | 0.22           | 0.00           | 0.00            | 0.00            | Bacteria | Chloroflexi             | Anaerolineae      | Anaerolineales       | Anaerolineaceae       | Anaerolinea     |
| 0.43           | 0.70           | 0.00            | 0.00            | 2.09           | 2.04           | 0.01            | 2.21            | Bacteria | Chloroflexi             | Anaerolineae      | Anaerolineales       | Anaerolineaceae       | uncultured      |
| 0.00           | 0.00           | 0.00            | 0.00            | 0.07           | 0.01           | 0.00            | 0.00            | Bacteria | Chloroflexi             | Caldilineae       | Caldilineales        | Caldilineaceae        | Caldilinea      |
| 0.00           | 0.00           | 0.00            | 0.00            | 0.47           | 0.00           | 0.01            | 0.01            | Bacteria | Chloroflexi             | Caldilineae       | Caldilineales        | Caldilineaceae        | uncultured      |
| 0.43           | 0.12           | 0.01            | 0.00            | 0.05           | 0.11           | 0.00            | 0.06            | Bacteria | Chloroflexi             | Chloroflexi       | Chloroflexales       | Chloroflexaceae       | Roseiflexus     |
| 0.00           | 0.00           | 0.00            | 0.00            | 0.05           | 0.00           | 0.00            | 0.00            | Bacteria | Chloroflexi             | Dehalococcoidetes | Order Incertae Sedis | Family Incertae Sedis | Dehalococcoides |
| 0.00           | 0.00           | 0.00            | 0.00            | 0.02           | 0.00           | 0.00            | 0.00            | Bacteria | Chloroflexi             | FS117-23B-02      |                      |                       |                 |
| 0.00           | 0.00           | 0.00            | 0.00            | 0.02           | 0.00           | 0.00            | 0.00            | Bacteria | Chloroflexi             | GIF3              |                      |                       |                 |
| 0.00           | 0.00           | 0.00            | 0.00            | 0.97           | 0.00           | 0.00            | 0.00            | Bacteria | Chloroflexi             | GIF9              |                      |                       |                 |
| 0.00           | 0.05           | 0.00            | 0.00            | 0.07           | 0.01           | 0.00            | 0.04            | Bacteria | Chloroflexi             | JG30-KF-CM66      |                      |                       |                 |
| 0.00           | 0.00           | 0.00            | 0.00            | 0.25           | 0.00           | 0.00            | 0.02            | Bacteria | Chloroflexi             | KD4-96            |                      |                       |                 |
| 0.00           | 0.00           | 0.00            | 0.00            | 0.02           | 0.00           | 0.00            | 0.00            | Bacteria | Chloroflexi             | Ktedonobacteria   | C0119                |                       |                 |
| 0.00           | 0.00           | 0.00            | 0.00            | 0.07           | 0.00           | 0.00            | 0.00            | Bacteria | Chloroflexi             | MSB-5B2           |                      |                       |                 |
| 0.00           | 0.00           | 0.00            | 0.00            | 0.70           | 0.00           | 0.00            | 0.00            | Bacteria | Chloroflexi             | MSBL5             |                      |                       |                 |
| 0.00           | 0.00           | 0.00            | 0.00            | 0.02           | 0.00           | 0.00            | 0.00            | Bacteria | Chloroflexi             | Napoli-4B-65      |                      |                       |                 |
| 0.00           | 0.00           | 0.00            | 0.00            | 0.10           | 0.00           | 0.00            | 0.00            | Bacteria | Chloroflexi             | S085              |                      |                       |                 |
| 0.00           | 0.00           | 0.00            | 0.00            | 0.12           | 0.00           | 0.00            | 0.00            | Bacteria | Chloroflexi             | SHA-26            |                      |                       |                 |
| 0.86           | 1.53           | 0.00            | 0.07            | 0.55           | 2.81           | 0.01            | 1.81            | Bacteria | Chloroflexi             | SL56 marine group |                      |                       |                 |
| 0.43           | 0.05           | 0.00            | 0.00            | 0.10           | 0.10           | 0.01            | 0.07            | Bacteria | Chloroflexi             | TK10              |                      |                       |                 |
| 0.00           | 0.00           | 0.00            | 0.00            | 0.10           | 0.02           | 0.00            | 0.01            | Bacteria | Chloroflexi             | Thermomicrobia    | JG30-KF-CM45         |                       |                 |
| 0.00           | 0.00           | 0.00            | 0.00            | 0.20           | 0.00           | 0.00            | 0.00            | Bacteria | Chloroflexi             | vadinBA26         |                      |                       |                 |
| 0.00           | 0.00           | 0.00            | 0.00            | 0.02           | 0.00           | 0.00            | 0.00            | Bacteria | Deferribacteres         | Deferribacteres   | Deferribacterales    | Family Incertae Sedis | Caldithrix      |
| 0.00           | 0.00           | 0.00            | 0.00            | 0.02           | 0.00           | 0.00            | 0.00            | Bacteria | Deferribacteres         | Deferribacteres   | Deferribacterales    | LCP-89                |                 |
| 0.00           | 0.00           | 0.00            | 0.00            | 0.00           | 0.00           | 0.01            | 0.00            | Bacteria | Deinococcus-Thermus     | Deinococci        | Deinococcales        | Deinococcaceae        | Deinococcus     |
| 0.00           | 0.00           | 0.00            | 0.00            | 0.02           | 0.00           | 0.00            | 0.00            | Bacteria | Deinococcus-Thermus     | Deinococci        | Deinococcales        | Trueperaceae          | Truepera        |
| 0.00           | 0.00           | 0.00            | 0.00            | 0.17           | 0.00           | 0.00            | 0.00            | Bacteria | Deinococcus-Thermus     | Deinococci        | KD3-62               |                       |                 |
| 0.00           | 0.00           | 0.00            | 0.00            | 0.02           | 0.00           | 0.00            | 0.00            | Bacteria | Elusimicrobia           | Elusimicrobia     | Lineage IIa          |                       |                 |
| 0.00           | 0.00           | 0.00            | 0.00            | 0.02           | 0.00           | 0.00            | 0.00            | Bacteria | Elusimicrobia           | Elusimicrobia     | Lineage IIb          |                       |                 |
| 0.00           | 0.00           | 0.00            | 0.00            | 0.07           | 0.00           | 0.00            | 0.00            | Bacteria | Elusimicrobia           | Elusimicrobia     | Lineage IIc          |                       |                 |
| 0.00           | 0.00           | 0.00            | 0.00            | 0.05           | 0.00           | 0.00            | 0.00            | Bacteria | Fibrobacteres           | Fibrobacteria     | Fibrobacterales      | B122                  |                 |

| Phase(I)-EL-PA | Phase(I)-EL-FL | Phase(II)-EL-PA | Phase(II)-EL-FL | Phase(I)-HL-PA | Phase(I)-HL-FL | Phase(II)-HL-PA | Phase(II)-HL-FL | Domain   | Phylum           | Class            | Order                   | Family                                  | Genus              |
|----------------|----------------|-----------------|-----------------|----------------|----------------|-----------------|-----------------|----------|------------------|------------------|-------------------------|-----------------------------------------|--------------------|
| 0.00           | 0.00           | 0.00            | 0.00            | 0.07           | 0.00           | 0.00            | 0.00            | Bacteria | Firmicutes       | Bacilli          | Bacillales              | Bacillaceae                             | Bacillus           |
| 0.00           | 0.00           | 0.00            | 0.00            | 0.00           | 0.01           | 0.00            | 0.01            | Bacteria | Firmicutes       | Bacilli          | Bacillales              | Paenibacillaceae                        | Paenibacillus      |
| 0.00           | 0.00           | 0.00            | 0.00            | 0.00           | 0.00           | 0.00            | 0.03            | Bacteria | Firmicutes       | Bacilli          | Bacillales              | Staphylococcaceae                       | Staphylococcus     |
| 0.00           | 0.00           | 0.00            | 0.00            | 0.02           | 0.00           | 0.00            | 0.00            | Bacteria | Firmicutes       | Bacilli          | Lactobacillales         | Lactobacillaceae                        | Lactobacillus      |
| 0.00           | 0.00           | 0.03            | 0.00            | 0.00           | 0.00           | 0.00            | 0.00            | Bacteria | Firmicutes       | Bacilli          | Lactobacillales         | Leuconostocaceae                        | Leuconostoc        |
| 0.00           | 0.00           | 0.00            | 0.00            | 0.00           | 0.02           | 0.00            | 0.00            | Bacteria | Firmicutes       | Bacilli          | Lactobacillales         | Streptococcaceae                        | Streptococcus      |
| 0.00           | 0.07           | 0.01            | 0.00            | 0.00           | 0.00           | 0.00            | 0.00            | Bacteria | Firmicutes       | Clostridia       | Clostridiales           | Christensenellaceae                     | uncultured         |
| 0.00           | 0.00           | 0.00            | 0.00            | 0.02           | 0.00           | 0.00            | 0.00            | Bacteria | Firmicutes       | Clostridia       | Clostridiales           | Family XII Incertae Sedis               | Acidaminobacter    |
| 0.00           | 0.00           | 0.00            | 0.00            | 0.02           | 0.00           | 0.00            | 0.00            | Bacteria | Firmicutes       | Clostridia       | Clostridiales           | Family XIII Incertae Sedis              | uncultured         |
| 0.00           | 0.00           | 0.00            | 0.00            | 0.02           | 0.01           | 0.00            | 0.00            | Bacteria | Firmicutes       | Clostridia       | Clostridiales           | Family XVIII Incertae Sedis             | Symbiobacterium    |
| 0.00           | 0.00           | 0.03            | 0.00            | 0.00           | 0.00           | 0.00            | 0.00            | Bacteria | Firmicutes       | Clostridia       | Clostridiales           | Lachnospiraceae                         | Butyrivibrio       |
| 0.00           | 0.02           | 0.00            | 0.00            | 0.00           | 0.00           | 0.00            | 0.00            | Bacteria | Firmicutes       | Clostridia       | Clostridiales           | Lachnospiraceae                         | Incertae Sedis     |
| 0.00           | 0.00           | 0.00            | 0.00            | 0.02           | 0.00           | 0.00            | 0.00            | Bacteria | Firmicutes       | Clostridia       | Clostridiales           | Lachnospiraceae                         | Roseburia          |
| 0.00           | 0.02           | 0.00            | 0.00            | 0.00           | 0.01           | 0.00            | 0.00            | Bacteria | Firmicutes       | Clostridia       | Clostridiales           | Lachnospiraceae                         | Syntrophococcus    |
| 0.00           | 0.02           | 0.04            | 0.00            | 0.02           | 0.00           | 0.00            | 0.01            | Bacteria | Firmicutes       | Clostridia       | Clostridiales           | Lachnospiraceae                         | uncultured         |
| 0.00           | 0.00           | 0.00            | 0.00            | 0.00           | 0.00           | 0.00            | 0.00            | Bacteria | Firmicutes       | Clostridia       | Clostridiales           | Peptostreptococcaceae                   | Incertae Sedis     |
| 0.00           | 0.00           | 0.00            | 0.00            | 0.02           | 0.00           | 0.00            | 0.00            | Bacteria | Firmicutes       | Clostridia       | Clostridiales           | Peptostreptococcaceae                   | uncultured         |
| 0.00           | 0.00           | 0.00            | 0.00            | 0.10           | 0.00           | 0.00            | 0.00            | Bacteria | Firmicutes       | Clostridia       | Clostridiales           | Ruminococcaceae                         | Incertae Sedis     |
| 0.00           | 0.02           | 0.03            | 0.00            | 0.02           | 0.00           | 0.00            | 0.00            | Bacteria | Firmicutes       | Clostridia       | Clostridiales           | Ruminococcaceae                         | Ruminococcus       |
| 0.00           | 0.02           | 0.01            | 0.00            | 0.00           | 0.00           | 0.00            | 0.00            | Bacteria | Firmicutes       | Clostridia       | Clostridiales           | Ruminococcaceae                         | Saccharofermentans |
| 0.00           | 0.05           | 0.09            | 0.00            | 0.12           | 0.02           | 0.00            | 0.00            | Bacteria | Firmicutes       | Clostridia       | Clostridiales           | Ruminococcaceae                         | uncultured         |
| 0.00           | 0.00           | 0.00            | 0.00            | 0.00           | 0.00           | 0.00            | 0.00            | Bacteria | Firmicutes       | Clostridia       | Clostridiales           | Veillonellaceae                         | Pelosinus          |
| 0.00           | 0.00           | 0.00            | 0.00            | 0.02           | 0.00           | 0.00            | 0.00            | Bacteria | Firmicutes       | Clostridia       | D8A-2                   |                                         |                    |
| 0.00           | 0.00           | 0.00            | 0.00            | 0.02           | 0.00           | 0.00            | 0.00            | Bacteria | Firmicutes       | Clostridia       | Thermoanaerobacteriales | Thermoanaerobacteraceae                 | Gelria             |
| 0.00           | 0.00           | 0.00            | 0.00            | 0.07           | 0.00           | 0.00            | 0.00            | Bacteria | GOUTA4           |                  |                         |                                         |                    |
| 0.00           | 0.05           | 0.00            | 0.00            | 0.00           | 0.03           | 0.00            | 0.07            | Bacteria | Gemmatimonadetes | Gemmatimonadetes | Gemmatimonadales        | Gemmatimonadaceae                       |                    |
| 0.00           | 0.02           | 0.00            | 0.00            | 0.10           | 0.08           | 0.01            | 0.04            | Bacteria | Gemmatimonadetes | Gemmatimonadetes | Gemmatimonadales        | Gemmatimonadaceae                       | Gemmatimonas       |
| 0.00           | 0.00           | 0.00            | 0.00            | 0.35           | 0.00           | 0.00            | 0.04            | Bacteria | Gemmatimonadetes | Gemmatimonadetes | Gemmatimonadales        | Gemmatimonadaceae                       | uncultured         |
| 0.00           | 0.00           | 0.00            | 0.00            | 0.07           | 0.00           | 0.00            | 0.00            | Bacteria | JL-ETNP-Z39      |                  |                         |                                         |                    |
| 0.00           | 0.00           | 0.00            | 0.00            | 0.05           | 0.00           | 0.00            | 0.00            | Bacteria | Lentisphaerae    | Lentisphaeria    | B55                     |                                         |                    |
| 0.00           | 0.00           | 0.00            | 0.00            | 0.10           | 0.00           | 0.00            | 0.00            | Bacteria | Lentisphaerae    | Lentisphaeria    | DEV055                  |                                         |                    |
| 0.00           | 0.00           | 0.00            | 0.00            | 0.02           | 0.00           | 0.00            | 0.00            | Bacteria | Lentisphaerae    | Lentisphaeria    | Victivallales           | Victivallaceae                          | Victivallis        |
| 0.00           | 0.00           | 0.00            | 0.00            | 0.02           | 0.00           | 0.00            | 0.00            | Bacteria | Lentisphaerae    | Lentisphaeria    | Victivallales           | Victivallaceae                          | uncultured         |
| 0.00           | 0.00           | 0.00            | 0.00            | 0.00           | 0.02           | 0.00            | 0.00            | Bacteria | MVP-21           |                  |                         |                                         |                    |
| 0.00           | 0.00           | 0.00            | 0.00            | 0.07           | 0.02           | 0.00            | 0.01            | Bacteria | NPL-UPA2         |                  |                         |                                         |                    |
| 0.00           | 0.00           | 0.00            | 0.00            | 0.10           | 0.00           | 0.00            | 0.00            | Bacteria | Nitrospirae      | Nitrospira       | Nitrospirales           | 0319-6A21                               |                    |
| 0.00           | 0.00           | 0.00            | 0.00            | 0.07           | 0.00           | 0.00            | 0.00            | Bacteria | Nitrospirae      | Nitrospira       | Nitrospirales           |                                         | 47209              |
| 0.00           | 0.00           | 0.00            | 0.00            | 2.14           | 0.00           | 0.00            | 0.03            | Bacteria | Nitrospirae      | Nitrospira       | Nitrospirales           | Nitrospiraceae                          | Nitrospira         |
| 0.43           | 0.00           | 0.00            | 0.00            | 1.42           | 0.00           | 0.00            | 0.00            | Bacteria | Nitrospirae      | Nitrospira       | Nitrospirales           | Nitrospiraceae                          | uncultured         |
| 0.00           | 0.00           | 0.00            | 0.00            | 1.10           | 0.00           | 0.01            | 0.00            | Bacteria | Nitrospirae      | Nitrospira       | Nitrospirales           | OPB95                                   |                    |
| 0.00           | 0.00           | 0.00            | 0.00            | 0.07           | 0.00           | 0.00            | 0.00            | Bacteria | OC31             |                  |                         |                                         |                    |
| 0.00           | 0.00           | 0.00            | 0.00            | 0.00           | 0.00           | 0.00            | 0.01            | Bacteria | Planctomycetes   | BD7-11           |                         |                                         |                    |
| 0.00           | 0.00           | 0.00            | 0.00            | 0.05           | 0.00           | 0.00            | 0.00            | Bacteria | Planctomycetes   | MBMPE71          |                         |                                         |                    |
| 0.00           | 0.00           | 0.00            | 0.00            | 0.07           | 0.00           | 0.00            | 0.00            | Bacteria | Planctomycetes   | OM190            |                         |                                         |                    |
| 0.00           | 0.00           | 0.00            | 0.00            | 0.15           | 0.00           | 0.00            | 0.00            | Bacteria | Planctomycetes   | Phycisphaerae    | CCM11a                  |                                         |                    |
| 0.00           | 0.00           | 0.00            | 0.00            | 0.12           | 0.00           | 0.00            | 0.00            | Bacteria | Planctomycetes   | Phycisphaerae    | MSBL9                   |                                         |                    |
| 0.00           | 0.00           | 0.00            | 0.00            | 0.07           | 0.00           | 0.00            | 0.00            | Bacteria | Planctomycetes   | Phycisphaerae    | ODP1230B30.09           |                                         |                    |
| 0.00           | 0.00           | 0.00            | 0.00            | 0.00           | 0.00           | 0.01            | 0.00            | Bacteria | Planctomycetes   | Phycisphaerae    | Phycisphaerales         | 08D2Z94 hypersaline microbial mat group |                    |
| 0.00           | 0.00           | 0.00            | 0.00            | 0.02           | 0.00           | 0.00            | 0.00            | Bacteria | Planctomycetes   | Phycisphaerae    | Phycisphaerales         | AKAU3564 sediment group                 |                    |
| 0.00           | 0.00           | 0.00            | 0.00            | 0.02           | 0.00           | 0.00            | 0.00            | Bacteria | Planctomycetes   | Phycisphaerae    | Phycisphaerales         | Phycisphaeraceae                        | AKYG587            |
| 5.58           | 3.59           | 0.04            | 0.05            | 7.50           | 5.08           | 0.15            | 4.07            | Bacteria | Planctomycetes   | Phycisphaerae    | Phycisphaerales         | Phycisphaeraceae                        | CL500-3            |
| 0.00           | 0.00           | 0.00            | 0.00            | 0.07           | 0.00           | 0.00            | 0.00            | Bacteria | Planctomycetes   | Phycisphaerae    | Phycisphaerales         | Phycisphaeraceae                        | I-8                |

| Phase(I)-EL-PA | Phase(I)-EL-FL | Phase(II)-EL-PA | Phase(II)-EL-FL | Phase(I)-HL-PA | Phase(I)-HL-FL | Phase(II)-HL-PA | Phase(II)-HL-FL | Domain   | Phylum         | Class               | Order            | Family                | Genus            |
|----------------|----------------|-----------------|-----------------|----------------|----------------|-----------------|-----------------|----------|----------------|---------------------|------------------|-----------------------|------------------|
| 0.00           | 0.00           | 0.00            | 0.00            | 0.00           | 0.00           | 0.00            | 0.00            | Bacteria | Planctomycetes | Phycisphaerae       | Phycisphaerales  | Phycisphaeraceae      | SM1A02           |
| 0.00           | 0.00           | 0.00            | 0.00            | 0.02           | 0.00           | 0.00            | 0.00            | Bacteria | Planctomycetes | Phycisphaerae       | Pla1 lineage     |                       |                  |
| 0.00           | 0.00           | 0.00            | 0.00            | 0.02           | 0.00           | 0.00            | 0.00            | Bacteria | Planctomycetes | Phycisphaerae       | S-70             |                       |                  |
| 0.00           | 0.00           | 0.00            | 0.00            | 0.02           | 0.00           | 0.00            | 0.00            | Bacteria | Planctomycetes | Phycisphaerae       | mle1-8           |                       |                  |
| 0.00           | 0.00           | 0.00            | 0.00            | 0.05           | 0.00           | 0.00            | 0.00            | Bacteria | Planctomycetes | Pla4 lineage        |                  |                       |                  |
| 0.00           | 0.00           | 0.00            | 0.00            | 0.02           | 0.00           | 0.00            | 0.00            | Bacteria | Planctomycetes | Planctomycetacia    | Planctomycetales | Planctomycetaceae     |                  |
| 0.00           | 0.00           | 0.00            | 0.00            | 0.02           | 0.00           | 0.01            | 0.00            | Bacteria | Planctomycetes | Planctomycetacia    | Planctomycetales | Planctomycetaceae     | Gemmata          |
| 0.00           | 0.00           | 0.00            | 0.00            | 0.05           | 0.00           | 0.00            | 0.00            | Bacteria | Planctomycetes | Planctomycetacia    | Planctomycetales | Planctomycetaceae     | Pir4 lineage     |
| 0.00           | 0.00           | 0.00            | 0.00            | 0.30           | 0.00           | 0.01            | 0.04            | Bacteria | Planctomycetes | Planctomycetacia    | Planctomycetales | Planctomycetaceae     | Pirellula        |
| 0.00           | 0.00           | 0.00            | 0.00            | 1.34           | 0.02           | 0.07            | 0.02            | Bacteria | Planctomycetes | Planctomycetacia    | Planctomycetales | Planctomycetaceae     | Planctomyces     |
| 0.00           | 0.00           | 0.00            | 0.00            | 0.02           | 0.00           | 0.00            | 0.00            | Bacteria | Planctomycetes | Planctomycetacia    | Planctomycetales | Planctomycetaceae     | Rhodopirellula   |
| 0.43           | 0.12           | 0.00            | 0.00            | 0.92           | 0.10           | 0.04            | 0.12            | Bacteria | Planctomycetes | Planctomycetacia    | Planctomycetales | Planctomycetaceae     | Schlesneria      |
| 0.00           | 0.05           | 0.00            | 0.00            | 0.52           | 0.11           | 0.01            | 0.22            | Bacteria | Planctomycetes | Planctomycetacia    | Planctomycetales | Planctomycetaceae     | uncultured       |
| 0.00           | 0.00           | 0.00            | 0.00            | 0.30           | 0.00           | 0.01            | 0.00            | Bacteria | Planctomycetes | vadinHA49           |                  |                       |                  |
| 0.00           | 0.00           | 0.00            | 0.00            | 0.05           | 0.00           | 0.00            | 0.00            | Bacteria | Proteobacteria | Alphaproteobacteria | Caulobacterales  | Caulobacteraceae      |                  |
| 0.00           | 0.00           | 0.00            | 0.00            | 0.07           | 0.00           | 0.00            | 0.00            | Bacteria | Proteobacteria | Alphaproteobacteria | Caulobacterales  | Caulobacteraceae      | Brevudimonas     |
| 0.00           | 0.02           | 0.00            | 0.00            | 0.10           | 0.00           | 0.02            | 0.07            | Bacteria | Proteobacteria | Alphaproteobacteria | Caulobacterales  | Caulobacteraceae      | Caulobacter      |
| 0.00           | 0.00           | 0.00            | 0.00            | 0.10           | 0.06           | 0.00            | 0.04            | Bacteria | Proteobacteria | Alphaproteobacteria | Caulobacterales  | Caulobacteraceae      | Phenylbacterium  |
| 0.00           | 0.00           | 0.01            | 0.00            | 0.10           | 0.02           | 0.01            | 0.03            | Bacteria | Proteobacteria | Alphaproteobacteria | Caulobacterales  | Caulobacteraceae      | uncultured       |
| 0.00           | 0.00           | 0.00            | 0.00            | 0.00           | 0.03           | 0.00            | 0.03            | Bacteria | Proteobacteria | Alphaproteobacteria | Caulobacterales  | Hyphomonadaceae       | Hirschia         |
| 0.00           | 0.00           | 0.00            | 0.00            | 0.00           | 0.02           | 0.00            | 0.00            | Bacteria | Proteobacteria | Alphaproteobacteria | Caulobacterales  | Hyphomonadaceae       | uncultured       |
| 0.00           | 0.05           | 0.00            | 0.00            | 0.00           | 0.06           | 0.00            | 0.07            | Bacteria | Proteobacteria | Alphaproteobacteria | MNG3             |                       |                  |
| 0.00           | 0.00           | 0.00            | 0.00            | 0.00           | 0.00           | 0.00            | 0.00            | Bacteria | Proteobacteria | Alphaproteobacteria | Rhizobiales      | 1174-901-12           |                  |
| 0.00           | 0.00           | 0.00            | 0.00            | 0.02           | 0.00           | 0.00            | 0.00            | Bacteria | Proteobacteria | Alphaproteobacteria | Rhizobiales      | A0839                 |                  |
| 0.00           | 0.00           | 0.00            | 0.00            | 0.05           | 0.00           | 0.00            | 0.00            | Bacteria | Proteobacteria | Alphaproteobacteria | Rhizobiales      | Aurantimonadaceae     |                  |
| 0.00           | 0.00           | 0.00            | 0.00            | 0.05           | 0.01           | 0.00            | 0.00            | Bacteria | Proteobacteria | Alphaproteobacteria | Rhizobiales      | Beijerinckiaceae      | uncultured       |
| 0.00           | 0.00           | 0.00            | 0.00            | 0.00           | 0.00           | 0.00            | 0.02            | Bacteria | Proteobacteria | Alphaproteobacteria | Rhizobiales      | Bradyrhizobiaceae     | Blastobacter     |
| 0.00           | 0.00           | 0.00            | 0.01            | 0.00           | 0.00           | 0.00            | 0.01            | Bacteria | Proteobacteria | Alphaproteobacteria | Rhizobiales      | Bradyrhizobiaceae     | Bosea            |
| 0.00           | 0.00           | 0.00            | 0.00            | 0.07           | 0.00           | 0.01            | 0.02            | Bacteria | Proteobacteria | Alphaproteobacteria | Rhizobiales      | Bradyrhizobiaceae     | Bradyrhizobium   |
| 0.00           | 0.00           | 0.00            | 0.00            | 0.00           | 0.00           | 0.00            | 0.01            | Bacteria | Proteobacteria | Alphaproteobacteria | Rhizobiales      | Bradyrhizobiaceae     | Nitrobacter      |
| 0.00           | 0.00           | 0.00            | 0.00            | 0.00           | 0.00           | 0.00            | 0.01            | Bacteria | Proteobacteria | Alphaproteobacteria | Rhizobiales      | Bradyrhizobiaceae     | Rhodopseudomonas |
| 0.00           | 0.00           | 0.00            | 0.00            | 0.00           | 0.00           | 0.00            | 0.01            | Bacteria | Proteobacteria | Alphaproteobacteria | Rhizobiales      | Bradyrhizobiaceae     | uncultured       |
| 0.00           | 0.00           | 0.00            | 0.00            | 0.02           | 0.00           | 0.00            | 0.00            | Bacteria | Proteobacteria | Alphaproteobacteria | Rhizobiales      | Brucellaceae          | Ochrobactrum     |
| 0.00           | 0.00           | 0.00            | 0.00            | 0.07           | 0.00           | 0.00            | 0.00            | Bacteria | Proteobacteria | Alphaproteobacteria | Rhizobiales      | D05-2                 |                  |
| 0.00           | 0.00           | 0.00            | 0.00            | 0.02           | 0.00           | 0.00            | 0.00            | Bacteria | Proteobacteria | Alphaproteobacteria | Rhizobiales      | DUNssu044             |                  |
| 0.00           | 0.00           | 0.00            | 0.00            | 0.07           | 0.02           | 0.00            | 0.00            | Bacteria | Proteobacteria | Alphaproteobacteria | Rhizobiales      | DUNssu371             |                  |
| 0.00           | 0.05           | 0.00            | 0.00            | 0.00           | 0.00           | 0.00            | 0.01            | Bacteria | Proteobacteria | Alphaproteobacteria | Rhizobiales      | F0723                 |                  |
| 0.00           | 0.00           | 0.00            | 0.00            | 0.00           | 0.00           | 0.01            | 0.00            | Bacteria | Proteobacteria | Alphaproteobacteria | Rhizobiales      | Family Incertae Sedis | Agaricola        |
| 0.00           | 0.00           | 0.00            | 0.00            | 0.02           | 0.00           | 0.00            | 0.00            | Bacteria | Proteobacteria | Alphaproteobacteria | Rhizobiales      | Family Incertae Sedis | Bauldia          |
| 0.00           | 0.00           | 0.00            | 0.00            | 0.00           | 0.00           | 0.00            | 0.01            | Bacteria | Proteobacteria | Alphaproteobacteria | Rhizobiales      | Family Incertae Sedis | Rhizomicrobium   |
| 0.00           | 0.00           | 0.00            | 0.00            | 0.00           | 0.02           | 0.00            | 0.01            | Bacteria | Proteobacteria | Alphaproteobacteria | Rhizobiales      | FukuN57               |                  |
| 0.00           | 0.00           | 0.00            | 0.00            | 0.00           | 0.00           | 0.01            | 0.01            | Bacteria | Proteobacteria | Alphaproteobacteria | Rhizobiales      | Hyphomicrobiaceae     | Blastochloris    |
| 0.00           | 0.00           | 0.00            | 0.00            | 0.02           | 0.01           | 0.01            | 0.02            | Bacteria | Proteobacteria | Alphaproteobacteria | Rhizobiales      | Hyphomicrobiaceae     | Devosia          |
| 0.00           | 0.00           | 0.00            | 0.00            | 0.00           | 0.00           | 0.00            | 0.00            | Bacteria | Proteobacteria | Alphaproteobacteria | Rhizobiales      | Hyphomicrobiaceae     | Filomicrobium    |
| 0.86           | 0.02           | 0.00            | 0.00            | 0.30           | 0.01           | 0.02            | 0.01            | Bacteria | Proteobacteria | Alphaproteobacteria | Rhizobiales      | Hyphomicrobiaceae     | Hyphomicrobium   |
| 0.00           | 0.00           | 0.00            | 0.00            | 0.17           | 0.00           | 0.02            | 0.00            | Bacteria | Proteobacteria | Alphaproteobacteria | Rhizobiales      | Hyphomicrobiaceae     | Pedomicrobium    |
| 0.00           | 0.00           | 0.00            | 0.00            | 0.00           | 0.02           | 0.00            | 0.07            | Bacteria | Proteobacteria | Alphaproteobacteria | Rhizobiales      | Hyphomicrobiaceae     | Rhodoplanes      |
| 0.00           | 0.00           | 0.00            | 0.00            | 0.00           | 0.00           | 0.00            | 0.03            | Bacteria | Proteobacteria | Alphaproteobacteria | Rhizobiales      | JG34-KF-361           |                  |
| 0.00           | 0.05           | 0.00            | 0.00            | 0.00           | 0.03           | 0.00            | 0.00            | Bacteria | Proteobacteria | Alphaproteobacteria | Rhizobiales      | KF-JG30-B3            |                  |
| 0.43           | 0.02           | 0.00            | 0.00            | 0.32           | 0.05           | 0.01            | 0.02            | Bacteria | Proteobacteria | Alphaproteobacteria | Rhizobiales      | MNG7                  |                  |
| 0.43           | 0.00           | 0.00            | 0.00            | 0.22           | 0.00           | 0.02            | 0.02            | Bacteria | Proteobacteria | Alphaproteobacteria | Rhizobiales      | Methylobacteriaceae   | Methylobacterium |
| 0.00           | 0.00           | 0.03            | 0.00            | 0.00           | 0.00           | 0.00            | 0.00            | Bacteria | Proteobacteria | Alphaproteobacteria | Rhizobiales      | Methylobacteriaceae   | uncultured       |

| Phase(I)-EL-PA | Phase(I)-EL-FL | Phase(II)-EL-PA | Phase(II)-EL-FL | Phase(I)-HL-PA | Phase(I)-HL-FL | Phase(II)-HL-PA | Phase(II)-HL-FL | Domain   | Phylum         | Class               | Order            | Family                | Genus                     |
|----------------|----------------|-----------------|-----------------|----------------|----------------|-----------------|-----------------|----------|----------------|---------------------|------------------|-----------------------|---------------------------|
| 0.00           | 0.00           | 0.00            | 0.00            | 0.05           | 0.00           | 0.00            | 0.00            | Bacteria | Proteobacteria | Alphaproteobacteria | Rhizobiales      | Methylocystaceae      | Methylosinus              |
| 0.00           | 0.02           | 0.00            | 0.00            | 0.00           | 0.04           | 0.00            | 0.01            | Bacteria | Proteobacteria | Alphaproteobacteria | Rhizobiales      | Methylocystaceae      | uncultured                |
| 0.00           | 0.00           | 0.00            | 0.00            | 0.00           | 0.00           | 0.00            | 0.00            | Bacteria | Proteobacteria | Alphaproteobacteria | Rhizobiales      | Phyllobacteriaceae    | Mesorhizobium             |
| 0.00           | 0.00           | 0.00            | 0.00            | 0.02           | 0.00           | 0.00            | 0.00            | Bacteria | Proteobacteria | Alphaproteobacteria | Rhizobiales      | Phyllobacteriaceae    | uncultured                |
| 0.00           | 0.00           | 0.00            | 0.00            | 0.02           | 0.00           | 0.01            | 0.01            | Bacteria | Proteobacteria | Alphaproteobacteria | Rhizobiales      | Rhizobiaceae          | Rhizobium                 |
| 0.86           | 0.00           | 0.00            | 0.00            | 0.12           | 0.00           | 0.00            | 0.00            | Bacteria | Proteobacteria | Alphaproteobacteria | Rhizobiales      | Rhodobiaceae          | Rhodobium                 |
| 0.00           | 0.00           | 0.00            | 0.00            | 0.00           | 0.02           | 0.00            | 0.00            | Bacteria | Proteobacteria | Alphaproteobacteria | Rhizobiales      | Xanthobacteraceae     | Labrys                    |
| 0.00           | 0.00           | 0.00            | 0.00            | 0.02           | 0.00           | 0.00            | 0.00            | Bacteria | Proteobacteria | Alphaproteobacteria | Rhizobiales      | Xanthobacteraceae     | Pseudolabrys              |
| 0.00           | 0.00           | 0.00            | 0.00            | 0.07           | 0.00           | 0.00            | 0.00            | Bacteria | Proteobacteria | Alphaproteobacteria | Rhizobiales      | Xanthobacteraceae     | Xanthobacter              |
| 0.00           | 0.00           | 0.00            | 0.00            | 0.02           | 0.02           | 0.00            | 0.02            | Bacteria | Proteobacteria | Alphaproteobacteria | Rhizobiales      | Xanthobacteraceae     | uncultured                |
| 0.00           | 0.10           | 0.00            | 0.00            | 0.00           | 0.11           | 0.00            | 0.19            | Bacteria | Proteobacteria | Alphaproteobacteria | Rhizobiales      | alpha cluster         |                           |
| 0.43           | 0.00           | 0.00            | 0.00            | 0.22           | 0.00           | 0.01            | 0.00            | Bacteria | Proteobacteria | Alphaproteobacteria | Rhodobacterales  | Rhodobacteraceae      | Paracoccus                |
| 0.00           | 0.00           | 0.00            | 0.00            | 0.07           | 0.00           | 0.00            | 0.00            | Bacteria | Proteobacteria | Alphaproteobacteria | Rhodobacterales  | Rhodobacteraceae      | Pseudorhodobacter         |
| 0.00           | 0.02           | 0.00            | 0.00            | 0.10           | 0.14           | 0.01            | 0.14            | Bacteria | Proteobacteria | Alphaproteobacteria | Rhodobacterales  | Rhodobacteraceae      | Rhodobacter               |
| 0.00           | 0.00           | 0.00            | 0.00            | 0.00           | 0.00           | 0.01            | 0.00            | Bacteria | Proteobacteria | Alphaproteobacteria | Rhodobacterales  | Rhodobacteraceae      | Rhodovulum                |
| 0.00           | 0.00           | 0.00            | 0.00            | 0.00           | 0.00           | 0.00            | 0.00            | Bacteria | Proteobacteria | Alphaproteobacteria | Rhodobacterales  | Rhodobacteraceae      | Roseovarius               |
| 0.00           | 0.00           | 0.00            | 0.00            | 0.07           | 0.00           | 0.00            | 0.00            | Bacteria | Proteobacteria | Alphaproteobacteria | Rhodobacterales  | Rhodobacteraceae      | Rubellimicrobium          |
| 0.00           | 0.00           | 0.00            | 0.00            | 0.07           | 0.00           | 0.00            | 0.00            | Bacteria | Proteobacteria | Alphaproteobacteria | Rhodobacterales  | Rhodobacteraceae      | Ruegeria                  |
| 0.00           | 0.00           | 0.00            | 0.00            | 0.22           | 0.00           | 0.02            | 0.00            | Bacteria | Proteobacteria | Alphaproteobacteria | Rhodobacterales  | Rhodobacteraceae      | uncultured                |
| 0.00           | 0.00           | 0.00            | 0.00            | 0.00           | 0.02           | 0.01            | 0.02            | Bacteria | Proteobacteria | Alphaproteobacteria | Rhodospirillales | Acetobacteraceae      |                           |
| 0.00           | 0.00           | 0.00            | 0.00            | 0.00           | 0.01           | 0.00            | 0.00            | Bacteria | Proteobacteria | Alphaproteobacteria | Rhodospirillales | Acetobacteraceae      | Acidiphilium              |
| 0.00           | 0.00           | 0.00            | 0.00            | 0.00           | 0.01           | 0.00            | 0.00            | Bacteria | Proteobacteria | Alphaproteobacteria | Rhodospirillales | Acetobacteraceae      | Acidocella                |
| 0.00           | 0.05           | 0.00            | 0.00            | 0.05           | 0.07           | 0.00            | 0.04            | Bacteria | Proteobacteria | Alphaproteobacteria | Rhodospirillales | Acetobacteraceae      | Rhodovastum               |
| 0.00           | 0.00           | 0.00            | 0.01            | 0.45           | 0.00           | 0.01            | 0.03            | Bacteria | Proteobacteria | Alphaproteobacteria | Rhodospirillales | Acetobacteraceae      | Roseomonas                |
| 0.00           | 0.02           | 0.00            | 0.00            | 0.00           | 0.02           | 0.01            | 0.01            | Bacteria | Proteobacteria | Alphaproteobacteria | Rhodospirillales | Acetobacteraceae      | uncultured                |
| 0.00           | 0.00           | 0.00            | 0.00            | 0.00           | 0.01           | 0.00            | 0.00            | Bacteria | Proteobacteria | Alphaproteobacteria | Rhodospirillales | DA111                 |                           |
| 0.00           | 0.05           | 0.00            | 0.00            | 0.15           | 0.01           | 0.00            | 0.02            | Bacteria | Proteobacteria | Alphaproteobacteria | Rhodospirillales | I-10                  |                           |
| 0.00           | 0.00           | 0.00            | 0.00            | 0.12           | 0.00           | 0.01            | 0.02            | Bacteria | Proteobacteria | Alphaproteobacteria | Rhodospirillales | JG37-AG-20            |                           |
| 0.00           | 0.00           | 0.00            | 0.00            | 0.02           | 0.01           | 0.01            | 0.01            | Bacteria | Proteobacteria | Alphaproteobacteria | Rhodospirillales | Rhodospirillaceae     | Azospirillum              |
| 0.00           | 0.00           | 0.00            | 0.01            | 0.05           | 0.03           | 0.00            | 0.16            | Bacteria | Proteobacteria | Alphaproteobacteria | Rhodospirillales | Rhodospirillaceae     | Defluviococcus            |
| 0.00           | 0.00           | 0.00            | 0.00            | 0.10           | 0.00           | 0.00            | 0.01            | Bacteria | Proteobacteria | Alphaproteobacteria | Rhodospirillales | Rhodospirillaceae     | Skermanella               |
| 0.00           | 0.07           | 0.00            | 0.00            | 0.42           | 0.11           | 0.00            | 0.26            | Bacteria | Proteobacteria | Alphaproteobacteria | Rhodospirillales | Rhodospirillaceae     | uncultured                |
| 0.00           | 0.10           | 0.00            | 0.00            | 0.32           | 0.16           | 0.01            | 0.20            | Bacteria | Proteobacteria | Alphaproteobacteria | Rhodospirillales | wr0007                |                           |
| 0.00           | 0.00           | 0.00            | 0.00            | 0.00           | 0.00           | 0.00            | 0.01            | Bacteria | Proteobacteria | Alphaproteobacteria | Rickettsiales    |                       |                           |
| 0.00           | 0.02           | 0.00            | 0.00            | 0.57           | 0.03           | 0.02            | 0.04            | Bacteria | Proteobacteria | Alphaproteobacteria | Rickettsiales    | Candidatus Captivus   |                           |
| 0.00           | 0.00           | 0.00            | 0.00            | 0.05           | 0.00           | 0.00            | 0.00            | Bacteria | Proteobacteria | Alphaproteobacteria | Rickettsiales    | EF100-94H03           |                           |
| 0.00           | 0.00           | 0.00            | 0.00            | 0.05           | 0.00           | 0.00            | 0.00            | Bacteria | Proteobacteria | Alphaproteobacteria | Rickettsiales    | Ho(lab)               |                           |
| 0.00           | 0.05           | 0.00            | 0.00            | 0.00           | 0.00           | 0.00            | 0.00            | Bacteria | Proteobacteria | Alphaproteobacteria | Rickettsiales    | Rickettsiaceae        | Candidatus Cryptoprodotis |
| 0.86           | 0.00           | 0.01            | 0.00            | 0.70           | 0.01           | 0.04            | 0.00            | Bacteria | Proteobacteria | Alphaproteobacteria | Rickettsiales    | Rickettsiaceae        | Rickettsia                |
| 0.00           | 0.00           | 0.00            | 0.00            | 0.00           | 0.00           | 0.01            | 0.00            | Bacteria | Proteobacteria | Alphaproteobacteria | Rickettsiales    | SAR116 clade          |                           |
| 0.00           | 0.00           | 0.00            | 0.00            | 0.00           | 0.01           | 0.00            | 0.00            | Bacteria | Proteobacteria | Alphaproteobacteria | Rickettsiales    | SM2D12                |                           |
| 0.00           | 0.00           | 0.00            | 0.00            | 0.00           | 0.02           | 0.00            | 0.01            | Bacteria | Proteobacteria | Alphaproteobacteria | Rickettsiales    | TK34                  |                           |
| 1.72           | 0.00           | 0.01            | 0.00            | 0.40           | 0.08           | 0.02            | 0.07            | Bacteria | Proteobacteria | Alphaproteobacteria | Rickettsiales    | mitochondria          |                           |
| 0.00           | 0.00           | 0.00            | 0.00            | 0.02           | 0.00           | 0.00            | 0.00            | Bacteria | Proteobacteria | Alphaproteobacteria | Rickettsiales    | uncultured            |                           |
| 0.00           | 0.22           | 0.00            | 0.01            | 0.15           | 0.13           | 0.01            | 0.17            | Bacteria | Proteobacteria | Alphaproteobacteria | SAR11 clade      |                       |                           |
| 1.29           | 23.88          | 0.01            | 0.20            | 1.17           | 21.92          | 0.01            | 11.77           | Bacteria | Proteobacteria | Alphaproteobacteria | SAR11 clade      | LD12 freshwater group |                           |
| 0.00           | 0.07           | 0.00            | 0.00            | 0.00           | 1.29           | 0.00            | 0.14            | Bacteria | Proteobacteria | Alphaproteobacteria | SAR11 clade      | Surface 1             |                           |
| 0.00           | 0.00           | 0.00            | 0.00            | 0.10           | 0.00           | 0.00            | 0.00            | Bacteria | Proteobacteria | Alphaproteobacteria | Sphingomonadales | Ellin6055             |                           |
| 0.43           | 0.00           | 0.00            | 0.00            | 0.15           | 0.00           | 0.00            | 0.00            | Bacteria | Proteobacteria | Alphaproteobacteria | Sphingomonadales | Erythrobacteraceae    | Erythrobacter             |
| 12.88          | 0.05           | 0.00            | 0.00            | 2.71           | 0.03           | 0.02            | 0.04            | Bacteria | Proteobacteria | Alphaproteobacteria | Sphingomonadales | GOBB3-C201            |                           |
| 0.00           | 0.05           | 0.00            | 0.00            | 0.00           | 0.01           | 0.00            | 0.00            | Bacteria | Proteobacteria | Alphaproteobacteria | Sphingomonadales | M05-Pitesti           |                           |
| 0.00           | 0.02           | 0.00            | 0.00            | 0.22           | 0.01           | 0.00            | 0.06            | Bacteria | Proteobacteria | Alphaproteobacteria | Sphingomonadales | Sphingomonadaceae     | Novosphingobium           |

| Phase(I)-EL-PA | Phase(I)-EL-FL | Phase(II)-EL-PA | Phase(II)-EL-FL | Phase(I)-HL-PA | Phase(I)-HL-FL | Phase(II)-HL-PA | Phase(II)-HL-FL | Domain   | Phylum         | Class               | Order             | Family             | Genus                   |
|----------------|----------------|-----------------|-----------------|----------------|----------------|-----------------|-----------------|----------|----------------|---------------------|-------------------|--------------------|-------------------------|
| 0.00           | 0.00           | 0.00            | 0.00            | 0.10           | 0.00           | 0.00            | 0.00            | Bacteria | Proteobacteria | Alphaproteobacteria | Sphingomonadales  | Sphingomonadaceae  | Sphingobium             |
| 0.43           | 0.00           | 0.00            | 0.00            | 0.17           | 0.03           | 0.02            | 0.05            | Bacteria | Proteobacteria | Alphaproteobacteria | Sphingomonadales  | Sphingomonadaceae  | Sphingomonas            |
| 0.00           | 0.00           | 0.00            | 0.00            | 0.02           | 0.00           | 0.00            | 0.00            | Bacteria | Proteobacteria | Alphaproteobacteria | Sphingomonadales  | Sphingomonadaceae  | Sphingopyxis            |
| 0.00           | 0.00           | 0.00            | 0.00            | 0.05           | 0.00           | 0.00            | 0.00            | Bacteria | Proteobacteria | Alphaproteobacteria | Sphingomonadales  | Sphingomonadaceae  | Zymomonas               |
| 0.00           | 0.00           | 0.00            | 0.00            | 0.35           | 0.00           | 0.00            | 0.00            | Bacteria | Proteobacteria | Betaproteobacteria  | B1-7BS            |                    |                         |
| 1.29           | 0.00           | 0.00            | 0.00            | 0.07           | 0.05           | 0.00            | 0.14            | Bacteria | Proteobacteria | Betaproteobacteria  | Burkholderiales   | Alcaligenaceae     | Achromobacter           |
| 0.00           | 0.00           | 0.00            | 0.00            | 0.00           | 0.01           | 0.00            | 0.01            | Bacteria | Proteobacteria | Betaproteobacteria  | Burkholderiales   | Alcaligenaceae     | Alcaligenes             |
| 0.00           | 0.02           | 0.00            | 0.00            | 0.07           | 0.03           | 0.00            | 0.01            | Bacteria | Proteobacteria | Betaproteobacteria  | Burkholderiales   | Alcaligenaceae     | Derxia                  |
| 0.00           | 0.10           | 0.01            | 0.01            | 0.07           | 0.20           | 0.00            | 0.10            | Bacteria | Proteobacteria | Betaproteobacteria  | Burkholderiales   | Alcaligenaceae     | GKS98 freshwater group  |
| 0.00           | 0.02           | 0.00            | 0.00            | 0.00           | 0.00           | 0.00            | 0.00            | Bacteria | Proteobacteria | Betaproteobacteria  | Burkholderiales   | Alcaligenaceae     | Kerstesia               |
| 0.00           | 0.00           | 0.00            | 0.00            | 0.07           | 0.00           | 0.00            | 0.00            | Bacteria | Proteobacteria | Betaproteobacteria  | Burkholderiales   | Alcaligenaceae     | MWH-UniP1 aquatic group |
| 0.00           | 0.00           | 0.01            | 0.00            | 0.42           | 0.00           | 0.00            | 0.01            | Bacteria | Proteobacteria | Betaproteobacteria  | Burkholderiales   | Alcaligenaceae     | uncultured              |
| 0.00           | 0.00           | 0.00            | 0.00            | 0.00           | 0.01           | 0.00            | 0.00            | Bacteria | Proteobacteria | Betaproteobacteria  | Burkholderiales   | Burkholderiaceae   | Limnobacter             |
| 0.00           | 0.29           | 0.45            | 0.95            | 0.52           | 0.44           | 0.18            | 0.52            | Bacteria | Proteobacteria | Betaproteobacteria  | Burkholderiales   | Burkholderiaceae   | Polynucleobacter        |
| 0.00           | 0.00           | 0.00            | 0.00            | 0.02           | 0.01           | 0.00            | 0.00            | Bacteria | Proteobacteria | Betaproteobacteria  | Burkholderiales   | Burkholderiaceae   | Ralstonia               |
| 0.00           | 0.00           | 0.00            | 0.00            | 0.02           | 0.01           | 0.00            | 0.04            | Bacteria | Proteobacteria | Betaproteobacteria  | Burkholderiales   | CM1G08             |                         |
| 0.00           | 0.05           | 0.01            | 0.00            | 0.00           | 0.05           | 0.01            | 0.02            | Bacteria | Proteobacteria | Betaproteobacteria  | Burkholderiales   | Comamonadaceae     |                         |
| 0.00           | 0.02           | 0.00            | 0.00            | 0.05           | 0.00           | 0.00            | 0.03            | Bacteria | Proteobacteria | Betaproteobacteria  | Burkholderiales   | Comamonadaceae     | Acidovorax              |
| 3.86           | 0.36           | 2.79            | 10.69           | 0.45           | 0.50           | 2.51            | 1.36            | Bacteria | Proteobacteria | Betaproteobacteria  | Burkholderiales   | Comamonadaceae     | Albidiferax             |
| 0.00           | 0.00           | 0.01            | 0.00            | 0.00           | 0.00           | 0.00            | 0.00            | Bacteria | Proteobacteria | Betaproteobacteria  | Burkholderiales   | Comamonadaceae     | Aquabacterium           |
| 0.00           | 0.00           | 0.00            | 0.00            | 0.00           | 0.02           | 0.00            | 0.01            | Bacteria | Proteobacteria | Betaproteobacteria  | Burkholderiales   | Comamonadaceae     | BAL58 marine group      |
| 0.00           | 0.00           | 0.00            | 0.00            | 0.00           | 0.01           | 0.00            | 0.04            | Bacteria | Proteobacteria | Betaproteobacteria  | Burkholderiales   | Comamonadaceae     | Caenimonas              |
| 0.00           | 0.56           | 0.53            | 18.01           | 0.02           | 0.16           | 0.19            | 3.60            | Bacteria | Proteobacteria | Betaproteobacteria  | Burkholderiales   | Comamonadaceae     | Chlorochromatium        |
| 0.00           | 0.00           | 0.00            | 0.00            | 0.07           | 0.00           | 0.00            | 0.00            | Bacteria | Proteobacteria | Betaproteobacteria  | Burkholderiales   | Comamonadaceae     | Comamonas               |
| 0.00           | 0.00           | 0.00            | 0.00            | 0.02           | 0.02           | 0.00            | 0.01            | Bacteria | Proteobacteria | Betaproteobacteria  | Burkholderiales   | Comamonadaceae     | Hydrogenophaga          |
| 0.00           | 0.00           | 0.00            | 0.00            | 0.05           | 0.00           | 0.00            | 0.00            | Bacteria | Proteobacteria | Betaproteobacteria  | Burkholderiales   | Comamonadaceae     | Leptothrix              |
| 4.29           | 1.38           | 0.38            | 0.14            | 0.52           | 1.09           | 0.25            | 0.62            | Bacteria | Proteobacteria | Betaproteobacteria  | Burkholderiales   | Comamonadaceae     | Limnohabitans           |
| 0.00           | 0.00           | 0.00            | 0.01            | 0.00           | 0.00           | 0.00            | 0.00            | Bacteria | Proteobacteria | Betaproteobacteria  | Burkholderiales   | Comamonadaceae     | Malikia                 |
| 0.00           | 0.00           | 0.00            | 0.00            | 0.02           | 0.01           | 0.00            | 0.00            | Bacteria | Proteobacteria | Betaproteobacteria  | Burkholderiales   | Comamonadaceae     | Methylibium             |
| 0.00           | 0.00           | 0.42            | 0.07            | 0.00           | 0.00           | 0.39            | 0.07            | Bacteria | Proteobacteria | Betaproteobacteria  | Burkholderiales   | Comamonadaceae     | Paucibacter             |
| 0.00           | 0.00           | 0.07            | 0.00            | 0.05           | 0.00           | 0.00            | 0.00            | Bacteria | Proteobacteria | Betaproteobacteria  | Burkholderiales   | Comamonadaceae     | Pelomonas               |
| 0.00           | 0.00           | 0.00            | 0.00            | 0.02           | 0.00           | 0.00            | 0.00            | Bacteria | Proteobacteria | Betaproteobacteria  | Burkholderiales   | Comamonadaceae     | Piscinibacter           |
| 12.02          | 0.10           | 1.22            | 0.03            | 2.19           | 0.11           | 0.01            | 0.09            | Bacteria | Proteobacteria | Betaproteobacteria  | Burkholderiales   | Comamonadaceae     | Polaromonas             |
| 0.00           | 0.00           | 0.00            | 0.00            | 0.00           | 0.00           | 0.00            | 0.02            | Bacteria | Proteobacteria | Betaproteobacteria  | Burkholderiales   | Comamonadaceae     | Pseudorhodofera         |
| 0.00           | 0.02           | 0.00            | 0.00            | 0.00           | 0.08           | 0.00            | 0.04            | Bacteria | Proteobacteria | Betaproteobacteria  | Burkholderiales   | Comamonadaceae     | Ramlibacter             |
| 0.00           | 0.00           | 0.00            | 0.00            | 0.22           | 0.00           | 0.00            | 0.00            | Bacteria | Proteobacteria | Betaproteobacteria  | Burkholderiales   | Comamonadaceae     | Rhizobacter             |
| 0.00           | 0.00           | 0.00            | 0.00            | 0.12           | 0.00           | 0.00            | 0.00            | Bacteria | Proteobacteria | Betaproteobacteria  | Burkholderiales   | Comamonadaceae     | Rubrivivax              |
| 0.00           | 0.00           | 0.00            | 0.02            | 0.37           | 0.02           | 0.00            | 0.04            | Bacteria | Proteobacteria | Betaproteobacteria  | Burkholderiales   | Comamonadaceae     | Simplicispira           |
| 0.00           | 0.12           | 0.00            | 0.01            | 0.02           | 0.02           | 0.01            | 0.02            | Bacteria | Proteobacteria | Betaproteobacteria  | Burkholderiales   | Comamonadaceae     | Variovorax              |
| 0.00           | 0.00           | 0.00            | 0.00            | 0.00           | 0.01           | 0.00            | 0.00            | Bacteria | Proteobacteria | Betaproteobacteria  | Burkholderiales   | Comamonadaceae     | Xenophilus              |
| 0.43           | 1.09           | 21.64           | 9.45            | 1.07           | 0.62           | 8.97            | 2.53            | Bacteria | Proteobacteria | Betaproteobacteria  | Burkholderiales   | Comamonadaceae     | uncultured              |
| 0.00           | 0.00           | 2.11            | 0.75            | 0.02           | 0.01           | 2.74            | 0.17            | Bacteria | Proteobacteria | Betaproteobacteria  | Burkholderiales   | Oxalobacteraceae   | Aquaspirillum           |
| 0.00           | 0.00           | 0.05            | 0.00            | 0.00           | 0.00           | 0.00            | 0.00            | Bacteria | Proteobacteria | Betaproteobacteria  | Burkholderiales   | Oxalobacteraceae   | Duganella               |
| 0.00           | 0.00           | 0.01            | 0.01            | 0.00           | 0.00           | 0.00            | 0.00            | Bacteria | Proteobacteria | Betaproteobacteria  | Burkholderiales   | Oxalobacteraceae   | Hermiimonas             |
| 0.00           | 0.00           | 0.09            | 0.00            | 0.00           | 0.00           | 0.07            | 0.00            | Bacteria | Proteobacteria | Betaproteobacteria  | Burkholderiales   | Oxalobacteraceae   | Janthinobacterium       |
| 0.00           | 0.07           | 11.01           | 0.62            | 2.29           | 0.03           | 5.31            | 0.11            | Bacteria | Proteobacteria | Betaproteobacteria  | Burkholderiales   | Oxalobacteraceae   | Massilia                |
| 0.00           | 0.02           | 0.00            | 0.00            | 0.00           | 0.02           | 0.00            | 0.06            | Bacteria | Proteobacteria | Betaproteobacteria  | Burkholderiales   | Oxalobacteraceae   | Paucimonas              |
| 0.43           | 0.00           | 35.32           | 0.91            | 0.12           | 0.00           | 60.22           | 0.48            | Bacteria | Proteobacteria | Betaproteobacteria  | Burkholderiales   | Oxalobacteraceae   | Undibacterium           |
| 0.00           | 0.02           | 0.00            | 0.00            | 0.00           | 0.00           | 0.02            | 0.00            | Bacteria | Proteobacteria | Betaproteobacteria  | Burkholderiales   | Oxalobacteraceae   | uncultured              |
| 0.00           | 0.00           | 0.00            | 0.00            | 0.05           | 0.00           | 0.00            | 0.01            | Bacteria | Proteobacteria | Betaproteobacteria  | Hot Creek 32      |                    |                         |
| 0.00           | 0.00           | 0.00            | 0.00            | 0.02           | 0.00           | 0.00            | 0.00            | Bacteria | Proteobacteria | Betaproteobacteria  | Hydrogenophilales | Hydrogenophilaceae | Ferritrophicum          |
| 0.00           | 0.00           | 0.00            | 0.00            | 0.12           | 0.00           | 0.00            | 0.00            | Bacteria | Proteobacteria | Betaproteobacteria  | Hydrogenophilales | Hydrogenophilaceae | Sulfuricella            |

| Phase(I)-EL-PA | Phase(I)-EL-FL | Phase(II)-EL-PA | Phase(II)-EL-FL | Phase(I)-HL-PA | Phase(I)-HL-FL | Phase(II)-HL-PA | Phase(II)-HL-FL | Domain   | Phylum         | Class               | Order              | Family             | Genus                 |
|----------------|----------------|-----------------|-----------------|----------------|----------------|-----------------|-----------------|----------|----------------|---------------------|--------------------|--------------------|-----------------------|
| 0.00           | 0.73           | 0.00            | 0.07            | 0.47           | 0.47           | 0.01            | 0.52            | Bacteria | Proteobacteria | Betaproteobacteria  | Hydrogenophiales   | Hydrogenophilaceae | Thiobacillus          |
| 0.00           | 0.00           | 0.00            | 0.00            | 0.25           | 0.00           | 0.01            | 0.00            | Bacteria | Proteobacteria | Betaproteobacteria  | Hydrogenophiales   | Hydrogenophilaceae | uncultured            |
| 0.00           | 0.00           | 0.00            | 0.00            | 0.00           | 0.06           | 0.00            | 0.02            | Bacteria | Proteobacteria | Betaproteobacteria  | Methylophilales    | Methylophilaceae   | LD28 freshwater group |
| 0.00           | 0.00           | 0.05            | 0.00            | 0.00           | 0.00           | 0.02            | 0.02            | Bacteria | Proteobacteria | Betaproteobacteria  | Methylophilales    | Methylophilaceae   | Methylotenera         |
| 0.86           | 1.29           | 0.12            | 0.07            | 0.35           | 1.63           | 0.09            | 1.56            | Bacteria | Proteobacteria | Betaproteobacteria  | Methylophilales    | Methylophilaceae   | OM43 clade            |
| 0.00           | 0.00           | 0.04            | 0.00            | 0.00           | 0.00           | 0.00            | 0.00            | Bacteria | Proteobacteria | Betaproteobacteria  | Neisseriales       | Neisseriaceae      | Iodobacter            |
| 0.43           | 0.00           | 0.00            | 0.00            | 0.12           | 0.01           | 0.00            | 0.00            | Bacteria | Proteobacteria | Betaproteobacteria  | Neisseriales       | Neisseriaceae      | Leeia                 |
| 0.43           | 0.00           | 0.00            | 0.00            | 0.22           | 0.01           | 0.00            | 0.01            | Bacteria | Proteobacteria | Betaproteobacteria  | Neisseriales       | Neisseriaceae      | Vogesella             |
| 0.00           | 0.02           | 0.00            | 0.00            | 0.00           | 0.00           | 0.00            | 0.00            | Bacteria | Proteobacteria | Betaproteobacteria  | Neisseriales       | Neisseriaceae      | uncultured            |
| 0.00           | 0.00           | 0.00            | 0.00            | 0.00           | 0.11           | 0.00            | 0.08            | Bacteria | Proteobacteria | Betaproteobacteria  | Nitrosomonadales   | Gallionellaceae    | Candidatus Nitrotoga  |
| 0.00           | 0.00           | 0.00            | 0.00            | 0.10           | 0.00           | 0.00            | 0.00            | Bacteria | Proteobacteria | Betaproteobacteria  | Nitrosomonadales   | Gallionellaceae    | Sideroxydans          |
| 0.00           | 0.00           | 0.00            | 0.00            | 0.05           | 0.00           | 0.01            | 0.00            | Bacteria | Proteobacteria | Betaproteobacteria  | Nitrosomonadales   | Gallionellaceae    | uncultured            |
| 0.00           | 0.34           | 0.00            | 0.01            | 0.05           | 1.94           | 0.00            | 2.56            | Bacteria | Proteobacteria | Betaproteobacteria  | Nitrosomonadales   | Nitrosomonadaceae  | Nitrosomonas          |
| 0.00           | 0.00           | 0.00            | 0.00            | 0.00           | 0.01           | 0.00            | 0.03            | Bacteria | Proteobacteria | Betaproteobacteria  | Nitrosomonadales   | Nitrosomonadaceae  | Nitrosospira          |
| 3.01           | 0.12           | 0.00            | 0.01            | 1.44           | 0.15           | 0.03            | 0.20            | Bacteria | Proteobacteria | Betaproteobacteria  | Nitrosomonadales   | Nitrosomonadaceae  | uncultured            |
| 0.00           | 0.05           | 0.00            | 0.00            | 0.02           | 0.01           | 0.00            | 0.04            | Bacteria | Proteobacteria | Betaproteobacteria  | Rhodocyclales      | Rhodocyclaceae     | Azospira              |
| 0.00           | 0.00           | 0.00            | 0.00            | 0.17           | 0.01           | 0.01            | 0.00            | Bacteria | Proteobacteria | Betaproteobacteria  | Rhodocyclales      | Rhodocyclaceae     | Dechloromonas         |
| 0.86           | 0.00           | 0.00            | 0.00            | 0.00           | 0.00           | 0.00            | 0.01            | Bacteria | Proteobacteria | Betaproteobacteria  | Rhodocyclales      | Rhodocyclaceae     | Georgfuchsia          |
| 0.00           | 0.00           | 0.00            | 0.00            | 0.02           | 0.00           | 0.00            | 0.00            | Bacteria | Proteobacteria | Betaproteobacteria  | Rhodocyclales      | Rhodocyclaceae     | Methyloversatilis     |
| 0.00           | 0.00           | 0.00            | 0.00            | 0.20           | 0.01           | 0.00            | 0.03            | Bacteria | Proteobacteria | Betaproteobacteria  | Rhodocyclales      | Rhodocyclaceae     | Propionivibrio        |
| 0.00           | 0.00           | 0.00            | 0.00            | 0.02           | 0.00           | 0.01            | 0.01            | Bacteria | Proteobacteria | Betaproteobacteria  | Rhodocyclales      | Rhodocyclaceae     | Quatronicoccus        |
| 0.00           | 0.05           | 0.00            | 0.00            | 0.47           | 0.03           | 0.00            | 0.02            | Bacteria | Proteobacteria | Betaproteobacteria  | Rhodocyclales      | Rhodocyclaceae     | Sulfuritalea          |
| 0.00           | 0.00           | 0.00            | 0.00            | 0.05           | 0.00           | 0.00            | 0.00            | Bacteria | Proteobacteria | Betaproteobacteria  | Rhodocyclales      | Rhodocyclaceae     | Uliginosibacterium    |
| 0.00           | 0.00           | 0.00            | 0.00            | 0.00           | 0.00           | 0.01            | 0.00            | Bacteria | Proteobacteria | Betaproteobacteria  | Rhodocyclales      | Rhodocyclaceae     | Zoogloea              |
| 0.00           | 0.05           | 0.00            | 0.02            | 0.02           | 0.04           | 0.02            | 0.04            | Bacteria | Proteobacteria | Betaproteobacteria  | Rhodocyclales      | Rhodocyclaceae     | uncultured            |
| 0.00           | 0.00           | 0.03            | 0.00            | 0.70           | 0.00           | 0.01            | 0.01            | Bacteria | Proteobacteria | Betaproteobacteria  | SC-1-84            |                    |                       |
| 0.00           | 0.78           | 0.00            | 0.29            | 0.27           | 0.24           | 0.04            | 0.34            | Bacteria | Proteobacteria | Betaproteobacteria  | TRA3-20            |                    |                       |
| 0.00           | 0.00           | 0.00            | 0.00            | 0.10           | 0.00           | 0.00            | 0.00            | Bacteria | Proteobacteria | CF2                 |                    |                    |                       |
| 0.00           | 0.00           | 0.00            | 0.00            | 0.07           | 0.00           | 0.00            | 0.00            | Bacteria | Proteobacteria | Deltaproteobacteria | 43F-1404R          |                    |                       |
| 0.00           | 0.07           | 0.00            | 0.00            | 0.00           | 0.01           | 0.00            | 0.06            | Bacteria | Proteobacteria | Deltaproteobacteria | Bdellovibrionales  | Bacteriovoraceae   | Peredibacter          |
| 0.00           | 0.00           | 0.00            | 0.00            | 0.15           | 0.00           | 0.00            | 0.00            | Bacteria | Proteobacteria | Deltaproteobacteria | Bdellovibrionales  | Bacteriovoraceae   | uncultured            |
| 0.00           | 0.00           | 0.00            | 0.00            | 0.07           | 0.00           | 0.00            | 0.00            | Bacteria | Proteobacteria | Deltaproteobacteria | Bdellovibrionales  | Bdellovibrionaceae | Bdellovibrio          |
| 0.43           | 0.00           | 0.00            | 0.00            | 0.37           | 0.05           | 0.00            | 0.02            | Bacteria | Proteobacteria | Deltaproteobacteria | Bdellovibrionales  | Bdellovibrionaceae | OM27 clade            |
| 0.00           | 0.00           | 0.00            | 0.00            | 0.50           | 0.00           | 0.00            | 0.00            | Bacteria | Proteobacteria | Deltaproteobacteria | Desulfarculales    | Desulfarculaceae   | uncultured            |
| 0.00           | 0.00           | 0.00            | 0.00            | 0.07           | 0.00           | 0.00            | 0.00            | Bacteria | Proteobacteria | Deltaproteobacteria | Desulfobacterales  | Desulfobacteraceae | Desulfatirhabdium     |
| 0.00           | 0.00           | 0.00            | 0.00            | 0.02           | 0.00           | 0.00            | 0.00            | Bacteria | Proteobacteria | Deltaproteobacteria | Desulfobacterales  | Desulfobacteraceae | Desulfobacterium      |
| 0.00           | 0.00           | 0.00            | 0.00            | 0.07           | 0.00           | 0.00            | 0.00            | Bacteria | Proteobacteria | Deltaproteobacteria | Desulfobacterales  | Desulfobacteraceae | SEEP-SRB1             |
| 0.00           | 0.00           | 0.00            | 0.00            | 0.52           | 0.00           | 0.00            | 0.00            | Bacteria | Proteobacteria | Deltaproteobacteria | Desulfobacterales  | Desulfobacteraceae | uncultured            |
| 0.00           | 0.00           | 0.00            | 0.00            | 0.02           | 0.00           | 0.00            | 0.00            | Bacteria | Proteobacteria | Deltaproteobacteria | Desulfobacterales  | Desulfobulbaceae   | uncultured            |
| 0.00           | 0.00           | 0.00            | 0.00            | 0.17           | 0.00           | 0.01            | 0.00            | Bacteria | Proteobacteria | Deltaproteobacteria | Desulfobacterales  | Nitrospinaceae     | uncultured            |
| 0.00           | 0.00           | 0.00            | 0.00            | 0.02           | 0.00           | 0.00            | 0.00            | Bacteria | Proteobacteria | Deltaproteobacteria | Desulfuromonadales | BVA18              |                       |
| 0.43           | 0.00           | 0.00            | 0.00            | 0.27           | 0.00           | 0.01            | 0.02            | Bacteria | Proteobacteria | Deltaproteobacteria | Desulfuromonadales | GR-WP33-58         |                       |
| 0.43           | 0.00           | 0.00            | 0.00            | 0.62           | 0.01           | 0.01            | 0.00            | Bacteria | Proteobacteria | Deltaproteobacteria | GR-WP33-30         |                    |                       |
| 0.00           | 0.00           | 0.00            | 0.00            | 0.17           | 0.02           | 0.01            | 0.01            | Bacteria | Proteobacteria | Deltaproteobacteria | Myxococcales       | 0319-6G20          |                       |
| 0.00           | 0.00           | 0.00            | 0.00            | 0.02           | 0.00           | 0.00            | 0.00            | Bacteria | Proteobacteria | Deltaproteobacteria | Myxococcales       | Cystobacterineae   | Cystobacteraceae      |
| 0.00           | 0.00           | 0.00            | 0.00            | 0.02           | 0.00           | 0.00            | 0.00            | Bacteria | Proteobacteria | Deltaproteobacteria | Myxococcales       | Cystobacterineae   | uncultured            |
| 0.00           | 0.00           | 0.00            | 0.00            | 0.05           | 0.00           | 0.00            | 0.00            | Bacteria | Proteobacteria | Deltaproteobacteria | Myxococcales       | Elev-16S-1158      |                       |
| 0.00           | 0.00           | 0.00            | 0.00            | 1.20           | 0.00           | 0.00            | 0.00            | Bacteria | Proteobacteria | Deltaproteobacteria | Myxococcales       | Nannocystineae     | Nannocystaceae        |
| 0.43           | 0.00           | 0.00            | 0.00            | 0.10           | 0.00           | 0.00            | 0.00            | Bacteria | Proteobacteria | Deltaproteobacteria | Myxococcales       | Nannocystineae     | uncultured            |
| 0.00           | 0.00           | 0.00            | 0.00            | 0.00           | 0.00           | 0.00            | 0.01            | Bacteria | Proteobacteria | Deltaproteobacteria | Myxococcales       | Sorangineae        | Phaselicystidaceae    |
| 0.00           | 0.00           | 0.00            | 0.00            | 0.02           | 0.03           | 0.00            | 0.00            | Bacteria | Proteobacteria | Deltaproteobacteria | Myxococcales       | Sorangineae        | Polyangiaceae         |
| 0.00           | 0.00           | 0.00            | 0.00            | 0.02           | 0.00           | 0.00            | 0.00            | Bacteria | Proteobacteria | Deltaproteobacteria | Myxococcales       | Sorangineae        | Sandaracinaceae       |



| Phase(I)-EL-PA | Phase(I)-EL-FL | Phase(II)-EL-PA | Phase(II)-EL-FL | Phase(I)-HL-PA | Phase(I)-HL-FL | Phase(II)-HL-PA | Phase(II)-HL-FL | Domain   | Phylum         | Class                 | Order                | Family                 | Genus                       |
|----------------|----------------|-----------------|-----------------|----------------|----------------|-----------------|-----------------|----------|----------------|-----------------------|----------------------|------------------------|-----------------------------|
| 0.00           | 0.02           | 0.00            | 0.00            | 0.10           | 0.00           | 0.00            | 0.00            | Bacteria | Proteobacteria | Deltaproteobacteria   | Myxococcales         | Sorangineae            | uncultured                  |
| 0.00           | 0.00           | 0.00            | 0.00            | 0.02           | 0.00           | 0.00            | 0.01            | Bacteria | Proteobacteria | Deltaproteobacteria   | Myxococcales         | mle1-27                |                             |
| 0.00           | 0.00           | 0.00            | 0.00            | 0.02           | 0.00           | 0.00            | 0.00            | Bacteria | Proteobacteria | Deltaproteobacteria   | Order Incertae Sedis | Syntrophorhabdaceae    | Syntrophorhabdus            |
| 0.00           | 0.00           | 0.00            | 0.00            | 0.40           | 0.00           | 0.00            | 0.01            | Bacteria | Proteobacteria | Deltaproteobacteria   | Sh765B-TzT-29        |                        |                             |
| 0.00           | 0.00           | 0.00            | 0.00            | 1.69           | 0.00           | 0.00            | 0.00            | Bacteria | Proteobacteria | Deltaproteobacteria   | Sva0485              |                        |                             |
| 0.00           | 0.00           | 0.00            | 0.00            | 0.17           | 0.00           | 0.00            | 0.00            | Bacteria | Proteobacteria | Deltaproteobacteria   | Syntrophobacteriales | Syntrophaceae          | Desulfobacca                |
| 0.00           | 0.19           | 0.00            | 0.00            | 0.00           | 0.05           | 0.00            | 0.03            | Bacteria | Proteobacteria | Deltaproteobacteria   | Syntrophobacteriales | Syntrophaceae          | Smithella                   |
| 0.00           | 0.00           | 0.00            | 0.00            | 0.20           | 0.00           | 0.00            | 0.00            | Bacteria | Proteobacteria | Deltaproteobacteria   | Syntrophobacteriales | Syntrophaceae          | Syntrophus                  |
| 0.00           | 0.00           | 0.00            | 0.00            | 0.40           | 0.00           | 0.00            | 0.00            | Bacteria | Proteobacteria | Deltaproteobacteria   | Syntrophobacteriales | Syntrophaceae          | uncultured                  |
| 0.00           | 0.00           | 0.00            | 0.00            | 0.05           | 0.00           | 0.00            | 0.00            | Bacteria | Proteobacteria | Deltaproteobacteria   | Syntrophobacteriales | Syntrophobacteraceae   | Desulfovirga                |
| 0.00           | 0.00           | 0.00            | 0.00            | 0.30           | 0.00           | 0.00            | 0.01            | Bacteria | Proteobacteria | Deltaproteobacteria   | Syntrophobacteriales | Syntrophobacteraceae   | uncultured                  |
| 0.00           | 0.00           | 0.00            | 0.00            | 0.17           | 0.00           | 0.00            | 0.01            | Bacteria | Proteobacteria | Elev-16S-509          |                      |                        |                             |
| 0.43           | 0.02           | 0.00            | 0.00            | 0.10           | 0.03           | 0.01            | 0.01            | Bacteria | Proteobacteria | Epsilonproteobacteria | Campylobacteriales   | Campylobacteraceae     | Arcobacter                  |
| 0.00           | 0.00           | 0.00            | 0.00            | 0.12           | 0.00           | 0.00            | 0.02            | Bacteria | Proteobacteria | Epsilonproteobacteria | Campylobacteriales   | Helicobacteraceae      | Sulfuricurvum               |
| 0.00           | 0.00           | 0.00            | 0.00            | 0.05           | 0.00           | 0.00            | 0.00            | Bacteria | Proteobacteria | Epsilonproteobacteria | Campylobacteriales   | Helicobacteraceae      | Sulfurimonas                |
| 0.43           | 0.00           | 0.00            | 0.01            | 0.00           | 0.00           | 0.01            | 0.02            | Bacteria | Proteobacteria | Epsilonproteobacteria | Campylobacteriales   | Helicobacteraceae      | Sulfurovum                  |
| 0.00           | 0.00           | 0.00            | 0.00            | 0.00           | 0.00           | 0.00            | 0.01            | Bacteria | Proteobacteria | Gammaproteobacteria   | 1013-28-CG33         |                        |                             |
| 0.00           | 0.19           | 0.00            | 0.01            | 0.02           | 0.68           | 0.00            | 0.92            | Bacteria | Proteobacteria | Gammaproteobacteria   | Acidithiobacillales  | KCM-B-112              |                             |
| 0.00           | 0.05           | 0.00            | 0.00            | 0.00           | 0.02           | 0.00            | 0.05            | Bacteria | Proteobacteria | Gammaproteobacteria   | Alteromonadales      | Alteromonadaceae       | BD1-7 clade                 |
| 0.00           | 0.00           | 0.00            | 0.00            | 0.05           | 0.00           | 0.00            | 0.00            | Bacteria | Proteobacteria | Gammaproteobacteria   | Alteromonadales      | Alteromonadaceae       | C1-B045                     |
| 0.00           | 0.00           | 0.00            | 0.00            | 0.00           | 0.00           | 0.00            | 0.00            | Bacteria | Proteobacteria | Gammaproteobacteria   | Alteromonadales      | Alteromonadaceae       | Dasania                     |
| 0.00           | 0.00           | 0.00            | 0.00            | 0.20           | 0.00           | 0.00            | 0.00            | Bacteria | Proteobacteria | Gammaproteobacteria   | Alteromonadales      | Alteromonadaceae       | Haliea                      |
| 0.00           | 0.00           | 0.00            | 0.00            | 0.15           | 0.00           | 0.00            | 0.00            | Bacteria | Proteobacteria | Gammaproteobacteria   | Alteromonadales      | Alteromonadaceae       | OM60(NORS) clade            |
| 0.00           | 0.00           | 0.00            | 0.00            | 0.02           | 0.00           | 0.00            | 0.00            | Bacteria | Proteobacteria | Gammaproteobacteria   | Alteromonadales      | Shewanellaceae         | Shewanella                  |
| 0.00           | 0.00           | 0.00            | 0.00            | 0.05           | 0.00           | 0.00            | 0.00            | Bacteria | Proteobacteria | Gammaproteobacteria   | Chromatiales         | Chromatiaceae          | Nitrosococcus               |
| 0.00           | 0.00           | 0.01            | 0.00            | 0.00           | 0.00           | 0.01            | 0.00            | Bacteria | Proteobacteria | Gammaproteobacteria   | Chromatiales         | Chromatiaceae          | Rheinheimera                |
| 0.00           | 0.00           | 0.00            | 0.00            | 0.05           | 0.00           | 0.00            | 0.00            | Bacteria | Proteobacteria | Gammaproteobacteria   | Chromatiales         | Ectothiorhodospiraceae | Acidiferrobacter            |
| 0.86           | 0.00           | 0.00            | 0.00            | 0.00           | 0.00           | 0.00            | 0.00            | Bacteria | Proteobacteria | Gammaproteobacteria   | Chromatiales         | Halothiobacillaceae    | Halothiobacillus            |
| 0.43           | 0.00           | 0.00            | 0.00            | 0.00           | 0.00           | 0.00            | 0.00            | Bacteria | Proteobacteria | Gammaproteobacteria   | Chromatiales         | Halothiobacillaceae    | uncultured                  |
| 0.00           | 0.00           | 0.00            | 0.00            | 0.00           | 0.00           | 0.00            | 0.01            | Bacteria | Proteobacteria | Gammaproteobacteria   | Enterobacteriales    | Enterobacteriaceae     | Enterobacter                |
| 0.00           | 0.00           | 0.00            | 0.00            | 0.05           | 0.02           | 0.00            | 0.00            | Bacteria | Proteobacteria | Gammaproteobacteria   | KI89A clade          |                        |                             |
| 0.00           | 0.00           | 0.00            | 0.00            | 0.15           | 0.00           | 0.00            | 0.00            | Bacteria | Proteobacteria | Gammaproteobacteria   | Legionellales        | Coxiellaceae           | Coxiella                    |
| 0.00           | 0.00           | 0.00            | 0.00            | 0.25           | 0.07           | 0.02            | 0.12            | Bacteria | Proteobacteria | Gammaproteobacteria   | Legionellales        | Legionellaceae         | Legionella                  |
| 0.00           | 0.00           | 0.00            | 0.00            | 0.00           | 0.01           | 0.00            | 0.02            | Bacteria | Proteobacteria | Gammaproteobacteria   | Methylococcales      | CABC2E06               |                             |
| 0.00           | 0.00           | 0.00            | 0.00            | 0.32           | 0.00           | 0.00            | 0.01            | Bacteria | Proteobacteria | Gammaproteobacteria   | Methylococcales      | Crenotrichaceae        | Crenothrix                  |
| 0.43           | 0.10           | 0.00            | 0.01            | 0.20           | 0.38           | 0.00            | 0.32            | Bacteria | Proteobacteria | Gammaproteobacteria   | Methylococcales      | Methylococcaceae       | Methylobacter               |
| 0.00           | 0.00           | 0.00            | 0.00            | 0.02           | 0.00           | 0.00            | 0.00            | Bacteria | Proteobacteria | Gammaproteobacteria   | NKB5                 |                        |                             |
| 0.00           | 0.10           | 0.00            | 0.00            | 0.10           | 0.14           | 0.00            | 0.24            | Bacteria | Proteobacteria | Gammaproteobacteria   | Oceanospirillales    | Oceanospirillaceae     | Pseudospirillum             |
| 0.00           | 0.15           | 0.00            | 0.00            | 0.00           | 0.08           | 0.00            | 0.09            | Bacteria | Proteobacteria | Gammaproteobacteria   | Oceanospirillales    | SAR86 clade            |                             |
| 0.00           | 0.00           | 0.00            | 0.00            | 0.02           | 0.00           | 0.00            | 0.00            | Bacteria | Proteobacteria | Gammaproteobacteria   | Oceanospirillales    | oc58                   |                             |
| 0.00           | 0.00           | 0.00            | 0.00            | 0.20           | 0.00           | 0.00            | 0.00            | Bacteria | Proteobacteria | Gammaproteobacteria   | Order Incertae Sedis | Family Incertae Sedis  | Arenicella                  |
| 0.00           | 0.00           | 0.00            | 0.00            | 0.05           | 0.00           | 0.00            | 0.00            | Bacteria | Proteobacteria | Gammaproteobacteria   | Order Incertae Sedis | Family Incertae Sedis  | Marinicella                 |
| 0.00           | 0.00           | 0.00            | 0.00            | 0.02           | 0.00           | 0.00            | 0.02            | Bacteria | Proteobacteria | Gammaproteobacteria   | Pseudomonadales      | Moraxellaceae          | Acinetobacter               |
| 0.00           | 0.00           | 0.00            | 0.00            | 0.00           | 0.00           | 0.00            | 0.01            | Bacteria | Proteobacteria | Gammaproteobacteria   | Pseudomonadales      | Moraxellaceae          | Perluclidibaca              |
| 0.00           | 0.00           | 0.00            | 0.00            | 0.02           | 0.00           | 0.00            | 0.00            | Bacteria | Proteobacteria | Gammaproteobacteria   | Pseudomonadales      | Pseudomonadaceae       | Cellvibrio                  |
| 0.00           | 0.00           | 0.13            | 0.18            | 0.10           | 0.01           | 0.03            | 0.03            | Bacteria | Proteobacteria | Gammaproteobacteria   | Pseudomonadales      | Pseudomonadaceae       | Pseudomonas                 |
| 0.00           | 0.05           | 0.33            | 0.66            | 0.00           | 0.00           | 0.23            | 0.07            | Bacteria | Proteobacteria | Gammaproteobacteria   | Pseudomonadales      | Pseudomonadaceae       | uncultured                  |
| 0.00           | 0.00           | 0.00            | 0.00            | 0.00           | 0.01           | 0.00            | 0.01            | Bacteria | Proteobacteria | Gammaproteobacteria   | Thiotrichales        | Piscirickettsiaceae    | Piscirickettsia             |
| 0.00           | 0.00           | 0.00            | 0.00            | 0.10           | 0.00           | 0.00            | 0.01            | Bacteria | Proteobacteria | Gammaproteobacteria   | Thiotrichales        | Thiotrichaceae         | Thiothrix                   |
| 0.00           | 0.00           | 0.00            | 0.00            | 0.00           | 0.00           | 0.00            | 0.03            | Bacteria | Proteobacteria | Gammaproteobacteria   | Xanthomonadales      | Sinobacteraceae        | Hydrocarboniphaga           |
| 0.00           | 0.00           | 0.00            | 0.00            | 0.02           | 0.00           | 0.00            | 0.00            | Bacteria | Proteobacteria | Gammaproteobacteria   | Xanthomonadales      | Sinobacteraceae        | JTB255 marine benthic group |
| 0.00           | 0.00           | 0.00            | 0.00            | 0.00           | 0.00           | 0.00            | 0.04            | Bacteria | Proteobacteria | Gammaproteobacteria   | Xanthomonadales      | Sinobacteraceae        | Nevskia                     |

| Phase(I)-EL-PA | Phase(I)-EL-FL | Phase(II)-EL-PA | Phase(II)-EL-FL | Phase(I)-HL-PA | Phase(I)-HL-FL | Phase(II)-HL-PA | Phase(II)-HL-FL | Domain      | Phylum          | Class                       | Order              | Family                   | Genus            |
|----------------|----------------|-----------------|-----------------|----------------|----------------|-----------------|-----------------|-------------|-----------------|-----------------------------|--------------------|--------------------------|------------------|
| 0.00           | 0.00           | 0.00            | 0.00            | 0.00           | 0.00           | 0.00            | 0.01            | Bacteria    | Proteobacteria  | Gammaproteobacteria         | Xanthomonadales    | Sinobacteraceae          | Solimonas        |
| 0.00           | 0.00           | 0.00            | 0.00            | 0.02           | 0.00           | 0.00            | 0.00            | Bacteria    | Proteobacteria  | Gammaproteobacteria         | Xanthomonadales    | Sinobacteraceae          | Steroidobacter   |
| 0.00           | 0.07           | 0.01            | 0.00            | 1.62           | 0.05           | 0.02            | 0.11            | Bacteria    | Proteobacteria  | Gammaproteobacteria         | Xanthomonadales    | Sinobacteraceae          | uncultured       |
| 0.00           | 0.00           | 0.00            | 0.00            | 0.62           | 0.00           | 0.00            | 0.00            | Bacteria    | Proteobacteria  | Gammaproteobacteria         | Xanthomonadales    | Xanthomonadaceae         | Arenimonas       |
| 0.43           | 0.00           | 0.01            | 0.00            | 0.00           | 0.00           | 0.00            | 0.00            | Bacteria    | Proteobacteria  | Gammaproteobacteria         | Xanthomonadales    | Xanthomonadaceae         | Luteimonas       |
| 0.00           | 0.00           | 0.00            | 0.00            | 0.00           | 0.00           | 0.00            | 0.00            | Bacteria    | Proteobacteria  | Gammaproteobacteria         | Xanthomonadales    | Xanthomonadaceae         | Lysobacter       |
| 0.43           | 0.00           | 0.00            | 0.00            | 0.05           | 0.00           | 0.00            | 0.00            | Bacteria    | Proteobacteria  | Gammaproteobacteria         | Xanthomonadales    | Xanthomonadaceae         | Pseudofulvimonas |
| 0.00           | 0.00           | 0.00            | 0.00            | 0.02           | 0.00           | 0.00            | 0.00            | Bacteria    | Proteobacteria  | Gammaproteobacteria         | Xanthomonadales    | Xanthomonadaceae         | Silanimonas      |
| 0.00           | 0.00           | 0.00            | 0.00            | 0.00           | 0.00           | 0.00            | 0.01            | Bacteria    | Proteobacteria  | Gammaproteobacteria         | Xanthomonadales    | Xanthomonadaceae         | Stenotrophomonas |
| 0.00           | 0.00           | 0.00            | 0.00            | 0.12           | 0.02           | 0.02            | 0.01            | Bacteria    | Proteobacteria  | Gammaproteobacteria         | Xanthomonadales    | Xanthomonadaceae         | Thermomonas      |
| 0.00           | 0.00           | 0.00            | 0.00            | 0.35           | 0.00           | 0.00            | 0.00            | Bacteria    | Proteobacteria  | Gammaproteobacteria         | Xanthomonadales    | Xanthomonadaceae         | uncultured       |
| 0.00           | 0.00           | 0.00            | 0.00            | 0.00           | 0.00           | 0.00            | 0.01            | Bacteria    | Proteobacteria  | MACA-EFT26                  |                    |                          |                  |
| 0.00           | 0.00           | 0.00            | 0.00            | 0.15           | 0.01           | 0.01            | 0.01            | Bacteria    | Proteobacteria  | SPOTS0CT00m83               |                    |                          |                  |
| 0.00           | 0.00           | 0.00            | 0.00            | 0.05           | 0.01           | 0.00            | 0.00            | Bacteria    | Proteobacteria  | TA18                        |                    |                          |                  |
| 0.00           | 0.00           | 0.00            | 0.00            | 0.05           | 0.00           | 0.00            | 0.00            | Bacteria    | Spirochaetes    | Spirochaetes                | Kazan-3B-09        |                          |                  |
| 0.00           | 0.00           | 0.00            | 0.00            | 0.00           | 0.02           | 0.00            | 0.01            | Bacteria    | Spirochaetes    | Spirochaetes                | Spirochaetales     | Leptospiraceae           | Leptospira       |
| 0.00           | 0.00           | 0.00            | 0.00            | 0.82           | 0.02           | 0.00            | 0.00            | Bacteria    | Spirochaetes    | Spirochaetes                | Spirochaetales     | Spirochaetaceae          | Spirochaeta      |
| 0.00           | 0.00           | 0.00            | 0.00            | 0.12           | 0.00           | 0.00            | 0.00            | Bacteria    | Spirochaetes    | Spirochaetes                | Spirochaetales     | Spirochaetaceae          | uncultured       |
| 0.00           | 0.00           | 0.00            | 0.00            | 0.47           | 0.00           | 0.00            | 0.00            | Bacteria    | TA06            |                             |                    |                          |                  |
| 0.00           | 0.00           | 0.00            | 0.00            | 0.10           | 0.01           | 0.00            | 0.00            | Bacteria    | TM6             |                             |                    |                          |                  |
| 0.00           | 0.00           | 0.00            | 0.00            | 0.00           | 0.00           | 0.00            | 0.00            | Bacteria    | Tenericutes     | Mollicutes                  | Entomoplasmatales  | Entomoplasmataceae       | Entomoplasma     |
| 0.00           | 0.00           | 0.00            | 0.00            | 0.00           | 0.01           | 0.01            | 0.01            | Bacteria    | Tenericutes     | Mollicutes                  | Entomoplasmatales  | Spiroplasmataceae        | Spiroplasma      |
| 0.00           | 0.00           | 0.00            | 0.00            | 0.00           | 0.00           | 0.00            | 0.01            | Bacteria    | Tenericutes     | Mollicutes                  | RF9                |                          |                  |
| 0.00           | 0.00           | 0.00            | 0.00            | 0.00           | 0.00           | 0.00            | 0.01            | Bacteria    | Verrucomicrobia | Candidatus Methylococcoides |                    |                          |                  |
| 0.00           | 0.00           | 0.00            | 0.00            | 0.42           | 0.03           | 0.01            | 0.06            | Bacteria    | Verrucomicrobia | OPB35 soil group            |                    |                          |                  |
| 0.00           | 0.00           | 0.00            | 0.00            | 0.00           | 0.00           | 0.00            | 0.03            | Bacteria    | Verrucomicrobia | OPB35 soil group            | Pedosphaera        |                          |                  |
| 0.43           | 0.51           | 0.00            | 0.00            | 0.45           | 1.38           | 0.01            | 1.70            | Bacteria    | Verrucomicrobia | Opiritutae                  | Opiritutales       | Opiritutaceae            | Opiritutus       |
| 1.29           | 4.47           | 0.04            | 0.02            | 1.49           | 2.05           | 0.01            | 1.54            | Bacteria    | Verrucomicrobia | Opiritutae                  | vadinHA64          |                          |                  |
| 0.00           | 0.00           | 0.00            | 0.00            | 0.07           | 0.00           | 0.00            | 0.00            | Bacteria    | Verrucomicrobia | S-BQ2-57 soil group         |                    |                          |                  |
| 0.00           | 0.00           | 0.00            | 0.00            | 0.32           | 0.00           | 0.01            | 0.01            | Bacteria    | Verrucomicrobia | Spartobacteria              | Chthoniobacterales | Chthoniobacteraceae      | Chthoniobacter   |
| 0.00           | 0.00           | 0.00            | 0.00            | 0.05           | 0.00           | 0.00            | 0.00            | Bacteria    | Verrucomicrobia | Spartobacteria              | Chthoniobacterales | DA101 soil group         |                  |
| 0.00           | 0.00           | 0.00            | 0.00            | 0.00           | 0.00           | 0.00            | 0.01            | Bacteria    | Verrucomicrobia | Spartobacteria              | Chthoniobacterales | FukuN18 freshwater group |                  |
| 0.00           | 0.02           | 0.00            | 0.00            | 0.00           | 0.00           | 0.00            | 0.00            | Bacteria    | Verrucomicrobia | Spartobacteria              | Chthoniobacterales | LD29                     |                  |
| 0.00           | 0.00           | 0.01            | 0.00            | 0.00           | 0.00           | 0.00            | 0.00            | Bacteria    | Verrucomicrobia | Verrucomicrobiae            | Verrucomicrobiales | Verrucomicrobiaceae      | Haloferula       |
| 0.00           | 0.00           | 0.00            | 0.00            | 0.02           | 0.00           | 0.00            | 0.00            | Bacteria    | Verrucomicrobia | Verrucomicrobiae            | Verrucomicrobiales | Verrucomicrobiaceae      | Prostheobacter   |
| 0.00           | 0.00           | 0.00            | 0.00            | 0.17           | 0.01           | 0.01            | 0.01            | Bacteria    | Verrucomicrobia | Verrucomicrobiae            | Verrucomicrobiales | Verrucomicrobiaceae      | uncultured       |
| 0.00           | 0.05           | 0.00            | 0.00            | 0.35           | 0.13           | 0.02            | 0.10            | Bacteria    | WCHB1-60        |                             |                    |                          |                  |
| 11.59          | 0.90           | 0.65            | 0.24            | 5.55           | 1.35           | 0.47            | 2.62            | No Relative |                 |                             |                    |                          |                  |
